# Supplementary material for: Integrated genome and metabolome mining unveiled structure and biosynthesis of novel lipopeptides from a deep‐sea Rhodococcus
Source: PubMed Central journal article supplement — Microb Biotechnol. 2024 Nov 24;17(11):e70011. doi: 10.1111/1751-7915.70011 (PMC11586506; doi:10.1111/1751-7915.70011), 2024-11-24
Supplement: MBT2-17-e70011-s001.pdf [file MBT2-17-e70011-s001.pdf]

# Integrated genome and metabolome mining unveiled structure and biosynthesis of novel lipopeptides from a deep-sea *Rhodococcus*

## Table of contents

### Tables

|                                                                                                     |   |
|-----------------------------------------------------------------------------------------------------|---|
| Table S1. Putative genes identified in the <i>rhp</i> gene cluster.....                             | 2 |
| Table S2. Putative genes identified in the <i>rmd</i> gene cluster.....                             | 2 |
| Table S3. MZMINE2 parameters for MS raw data processing .....                                       | 3 |
| Table S4. Relative abundance of rhodoheptins A-U in the purified rhodoheptin-enriched fraction..... | 3 |

### Figures

|                                                                                                                                        |    |
|----------------------------------------------------------------------------------------------------------------------------------------|----|
| Figure S1. Global molecular network of the SPE fractions (F1-F5) from <i>Rhodococcus</i> sp. I2R.....                                  | 5  |
| Figure S2. Neutral loss/precursor <i>m/z</i> plots from HR-MS/MS data of the F5 fraction.....                                          | 5  |
| Figure S3. Product ion/precursor <i>m/z</i> plots from HR-MS/MS data of the F5 fraction.....                                           | 6  |
| Figure S4. Oil-spreading assay to assess biosurfactant activity of the SPE fractions F1-F5.....                                        | 6  |
| Figure S5. HR-MS <sup>2</sup> spectra of the [M+H] <sup>+</sup> pseudomolecular ion of rhodoheptin A ( <b>1</b> ).....                 | 7  |
| Figure S6. HR-MS <sup>2</sup> spectra of the [M+H] <sup>+</sup> pseudomolecular ion of rhodoheptin B ( <b>2</b> ).....                 | 7  |
| Figure S7. HR-MS <sup>2</sup> spectra of the [M+H] <sup>+</sup> pseudomolecular ion of rhodoheptin C ( <b>3</b> ).....                 | 8  |
| Figure S8. HR-MS <sup>2</sup> spectra of the [M+H] <sup>+</sup> pseudomolecular ion of rhodoheptin D ( <b>4</b> ).....                 | 8  |
| Figure S9. HR-MS <sup>2</sup> spectra of the [M+H] <sup>+</sup> pseudomolecular ion of rhodoheptin F ( <b>6</b> ).....                 | 9  |
| Figure S10. HR-MS <sup>2</sup> spectra of the [M+H] <sup>+</sup> pseudomolecular ion of rhodoheptin G ( <b>7</b> ).....                | 9  |
| Figure S11. HR-MS <sup>2</sup> spectra of the [M+H] <sup>+</sup> pseudomolecular ion of rhodoheptin H ( <b>8</b> ).....                | 10 |
| Figure S12. HR-MS <sup>2</sup> spectra of the [M+H] <sup>+</sup> pseudomolecular ion of rhodoheptin I ( <b>9</b> ).....                | 10 |
| Figure S13. HR-MS <sup>2</sup> spectra of the [M+H] <sup>+</sup> pseudomolecular ion of rhodoheptin J ( <b>10</b> ).....               | 11 |
| Figure S14. HR-MS <sup>2</sup> spectra of the [M+H] <sup>+</sup> pseudomolecular ion of rhodoheptin K ( <b>11</b> ) <sup>1</sup> ..... | 11 |
| Figure S15. HR-MS <sup>2</sup> spectra of the [M+H] <sup>+</sup> pseudomolecular ion of rhodoheptin L ( <b>12</b> ).....               | 12 |
| Figure S16. HR-MS <sup>2</sup> spectra of the [M+H] <sup>+</sup> pseudomolecular ion of rhodoheptin M ( <b>13</b> ).....               | 12 |
| Figure S17. HR-MS <sup>2</sup> spectra of the [M+H] <sup>+</sup> pseudomolecular ion of rhodoheptin N ( <b>14</b> ).....               | 13 |
| Figure S18. HR-MS <sup>2</sup> spectra of the [M+H] <sup>+</sup> pseudomolecular ion of rhodoheptin O ( <b>15</b> ).....               | 13 |
| Figure S19. HR-MS <sup>2</sup> spectra of the [M+H] <sup>+</sup> pseudomolecular ion of rhodoheptin P ( <b>16</b> ).....               | 14 |
| Figure S20. HR-MS <sup>2</sup> spectra of the [M+H] <sup>+</sup> pseudomolecular ion of rhodoheptin Q ( <b>17</b> ).....               | 14 |
| Figure S21. HR-MS <sup>2</sup> spectra of the [M+H] <sup>+</sup> pseudomolecular ion of rhodoheptin S ( <b>19</b> ).....               | 15 |
| Figure S22. HR-MS <sup>2</sup> spectra of the [M+H] <sup>+</sup> pseudomolecular ion of rhodoheptin T ( <b>20</b> ).....               | 15 |
| Figure S23. HR-MS <sup>2</sup> spectra of the [M+H] <sup>+</sup> pseudomolecular ion of rhodoheptin U ( <b>21</b> ).....               | 16 |
| Figure S24. HR-MS <sup>2</sup> spectra of the [M+2H] <sup>2+</sup> pseudomolecular ion of rhodamide H ( <b>31</b> ).....               | 16 |
| Figure S25. HR-MS <sup>2</sup> spectra of the [M+2H] <sup>2+</sup> pseudomolecular ion of rhodamide P ( <b>40</b> ).....               | 17 |
| Figure S26. HR-MS <sup>2</sup> spectra of the [M+2H] <sup>2+</sup> pseudomolecular ion of isorhodamide E ( <b>28</b> ).....            | 17 |
| Figure S27. Extracted LC-MS ion chromatograms from F5 and the purified rhodoheptin-enriched fraction.....                              | 18 |
| Figure S28. AntiSMASH analysis of the <i>rhp</i> and related NRPS gene clusters .....                                                  | 18 |
| Figure S29. Clunker visualisation of similar clusters to rhodoheptin BGC.....                                                          | 19 |
| Figure S30. Clunker visualisation of similar clusters to rhodamide BGC.....                                                            | 20 |

**Table S1.** Putative genes identified in the *rhp* gene cluster.

| protein    | amino acids | proposed function         | closest homolog (protein, origin)                                             | identities/positives (%) | accession #    |
|------------|-------------|---------------------------|-------------------------------------------------------------------------------|--------------------------|----------------|
| ORF1       | 391         | regulatory enzyme         | histidine kinase<br>[ <i>Rhodococcus</i> ]                                    | 100/100                  | WP_230558200.1 |
| ORF2       | 219         | regulatory enzyme         | response regulator transcription factor<br>[ <i>Rhodococcus yunnanensis</i> ] | 99/100                   | WP_269419590.1 |
| ORF3       | 165         |                           | FxsA family protein<br>[ <i>Rhodococcus</i> ]                                 | 100/100                  | WP_230558198.1 |
| ORF4       | 537         |                           | amidohydrolase family protein<br>[ <i>Rhodococcus yunnanensis</i> ]           | 99/99                    | WP_269419591.1 |
| ORF5       | 531         | <i>N</i> -acyltransferase | apolipoprotein <i>N</i> -acyltransferase<br>[ <i>Rhodococcus</i> sp. KRD197]  | 98/99                    | WP_206511629.1 |
| <i>rhp</i> | 8919        | NRPS                      | non-ribosomal peptide synthase<br>[uncultured <i>Rhodococcus</i> sp.]         | 98/98                    | WP_300399371.1 |
| ORF7       | 199         |                           | hypothetical protein<br>[ <i>Rhodococcus</i> ]                                | 100/100                  | WP_230558194.1 |
| ORF8       | 686         |                           | aminodeoxychorismate synthase<br>[ <i>Rhodococcus</i> sp. KRD197]             | 99/100                   | WP_206511506.1 |
| ORF9       | 104         |                           | chorismate mutase<br>[ <i>Rhodococcus</i> ]                                   | 100/100                  | WP_075839937.1 |
| ORF10      | 112         |                           | RNA polymerase-binding protein RbpA<br>[ <i>Rhodococcus</i> ]                 | 100/100                  | WP_075839938.1 |
| ORF11      | 66          |                           | hypothetical protein BJF84_24140<br>[ <i>Rhodococcus</i> sp. CUA-806]         | 98/100                   | OLT33093.1     |
| ORF12      | 196         |                           | sugar O-acetyltransferase<br>[uncultured <i>Rhodococcus</i> sp.]              | 100/100                  | WP_230558192.1 |
| ORF13      | 342         |                           | linear amide C-N hydrolase<br>[ <i>Rhodococcus</i> ]                          | 100/100                  | WP_230558191.1 |
| ORF14      | 337         |                           | GGDEF domain-containing protein<br>[ <i>Rhodococcus</i> ]                     | 99/100                   | WP_230558190.1 |
| ORF15      | 381         | regulatory enzyme         | histidine kinase<br>[ <i>Rhodococcus</i> ]                                    | 100/100                  | WP_230558189.1 |

**Table S2.** Putative genes identified in the *rmd* gene cluster.

| protein     | amino acids | proposed function | closest homolog (protein, origin)                                        | identities/positives (%) | accession #    |
|-------------|-------------|-------------------|--------------------------------------------------------------------------|--------------------------|----------------|
| <i>rmdE</i> | 540         | acyl-CoA ligase   | AMP-binding protein<br>[ <i>Rhodococcus yunnanensis</i> ]                | 99/99                    | WP_269419124.1 |
| <i>rmdF</i> | 662         | acyl-CoA ligase   | acetoacetate-CoA ligase,<br>[ <i>Rhodococcus yunnanensis</i> ]           | 91/94                    | WP_269419125.1 |
| ORF3        | 144         |                   | thioesterase family protein<br>[ <i>Rhodococcus</i> ]                    | 100/100                  | WP_269419126.1 |
| ORF4        | 482         |                   | amidohydrolase family protein<br>[ <i>Rhodococcus</i> ]                  | 100/100                  | WP_230555287.1 |
| ORF5        | 209         | regulatory enzyme | TetR/AcrR family transcriptional<br>regulator [ <i>Rhodococcus</i> ]     | 100/100                  | WP_230555286.1 |
| ORF6        | 141         |                   | PPOX class F420-dependent<br>oxidoreductase [ <i>Rhodococcus</i> ]       | 100/100                  | WP_206511370.1 |
| <i>rmdA</i> | 9858        | NRPS              | non-ribosomal peptide synthetase,<br>[uncultured <i>Rhodococcus</i> sp.] | 100/100                  | WP_300396890.1 |
| <i>rmdB</i> | 3211        | NRPS              | non-ribosomal peptide synthetase,<br>[uncultured <i>Rhodococcus</i> sp.] | 100/100                  | WP_294638938.1 |
| <i>rmdC</i> | 821         | NRPS              | non-ribosomal peptide synthetase,<br>[uncultured <i>Rhodococcus</i> sp.] | 99/100                   | WP_300500358.1 |
| <i>rmdD</i> | 1961        | NRPS              | non-ribosomal peptide synthetase,<br>[uncultured <i>Rhodococcus</i> sp.] | 99/99                    | WP_294639008.1 |
| ORF11       | 354         |                   | esterase<br>[ <i>Rhodococcus</i> sp. CUA-806]                            | 99/100                   | OLT31464.1     |
| ORF12       | 2888        |                   | non-ribosomal peptide synthetase,<br>[ <i>Rhodococcus</i> sp. KRD197]    | 99/99                    | WP_307786731.1 |

|       |      |             |                                                                       |         |                |
|-------|------|-------------|-----------------------------------------------------------------------|---------|----------------|
| ORF13 | 1202 |             | non-ribosomal peptide synthetase, [uncultured <i>Rhodococcus</i> sp.] | 99/100  | WP_300499683.1 |
| ORF14 | 322  |             | sulfotransferase [Rhodococcus sp. KRD197]                             | 99/100  | WP_075838817.1 |
| ORF15 | 323  |             | alpha/beta fold hydrolase [Rhodococcus sp. KRD197]                    | 99/99   | WP_307786732.1 |
| ORF16 | 282  | transporter | ABC transporter permease [Rhodococcus]                                | 99/100  | WP_230557628.1 |
| ORF17 | 281  | transporter | ABC transporter permease [Rhodococcus]                                | 100/100 | WP_206509620.1 |
| ORF18 | 323  | transporter | ATP-binding cassette domain-containing protein [Rhodococcus]          | 100/100 | WP_206509621.1 |

**Table S3.** MZMINE2 parameters for MS raw data processing.

| Feature detection                                                                                                   |                                                                                                                                                                                                                                                                            |
|---------------------------------------------------------------------------------------------------------------------|----------------------------------------------------------------------------------------------------------------------------------------------------------------------------------------------------------------------------------------------------------------------------|
| MS level 1                                                                                                          | 1.0e5                                                                                                                                                                                                                                                                      |
| MS level 2                                                                                                          | 1.0e3                                                                                                                                                                                                                                                                      |
| ADAP chromatogram builder                                                                                           | <ul style="list-style-type: none"> <li>• group intensity threshold: 5.0e4</li> <li>• minimum highest intensity: 5.0e4</li> <li>• <i>m/z</i> tolerance: 0.01 <i>m/z</i> or 10 ppm</li> </ul>                                                                                |
| Chromatogram deconvolution                                                                                          |                                                                                                                                                                                                                                                                            |
| baseline cut-off                                                                                                    | <ul style="list-style-type: none"> <li>• minimum peak height: 9.0e4</li> <li>• peak duration range: 0.0 – 10.0 min</li> <li>• baseline level: 5.0e4</li> <li>• <i>m/z</i> range for MS2 scan pairing: 0.01 Da</li> <li>• RT range for MS2 scan pairing: 0.2 min</li> </ul> |
| Alignment                                                                                                           |                                                                                                                                                                                                                                                                            |
| Join aligner                                                                                                        | <ul style="list-style-type: none"> <li>• <i>m/z</i> tolerance: 0.002 <i>m/z</i> or 5 ppm</li> <li>• retention time tolerance: 0.1 min</li> </ul>                                                                                                                           |
| Identification                                                                                                      |                                                                                                                                                                                                                                                                            |
| Adduct search ([M+Na-H], [M+K-H], [M+Mg-2H], [M+NH <sub>3</sub> ], [M-Na+NH <sub>4</sub> ], [M+1, <sup>13</sup> C]) | <ul style="list-style-type: none"> <li>• retention time tolerance: 0.1 min</li> <li>• <i>m/z</i> tolerance: 0.002 <i>m/z</i> or 5 ppm</li> <li>• max relative adduct peak height: 100%</li> </ul>                                                                          |

**Table S4.** Relative abundance of rhodoheptins A-U in the purified rhodoheptin-enriched fraction.

| compound           | [M+H] <sup>+</sup>                                              | <i>m/z</i> | <i>R<sub>t</sub></i> (min) | relative abundance (%) |
|--------------------|-----------------------------------------------------------------|------------|----------------------------|------------------------|
| rhodoheptin A (1)  | C <sub>52</sub> H <sub>96</sub> N <sub>7</sub> O <sub>11</sub>  | 994.7152   | 22.3                       | 0.8                    |
| rhodoheptin B (2)  | C <sub>53</sub> H <sub>98</sub> N <sub>7</sub> O <sub>11</sub>  | 1008.7305  | 26.0                       | 0.6                    |
| rhodoheptin C (3)  | C <sub>53</sub> H <sub>98</sub> N <sub>7</sub> O <sub>11</sub>  | 1008.7311  | 27.3                       | 0.5                    |
| rhodoheptin D (4)  | C <sub>54</sub> H <sub>98</sub> N <sub>7</sub> O <sub>11</sub>  | 1020.7308  | 23.2                       | 2.4                    |
| rhodoheptin E (5)  | C <sub>54</sub> H <sub>100</sub> N <sub>7</sub> O <sub>11</sub> | 1022.7470  | 30.1                       | 13.6                   |
| rhodoheptin F (6)  | C <sub>55</sub> H <sub>94</sub> N <sub>7</sub> O <sub>11</sub>  | 1028.7001  | 21.4                       | 0.9                    |
| rhodoheptin G (7)  | C <sub>56</sub> H <sub>96</sub> N <sub>7</sub> O <sub>11</sub>  | 1042.7154  | 26.6                       | 0.7                    |
| rhodoheptin H (8)  | C <sub>56</sub> H <sub>102</sub> N <sub>7</sub> O <sub>11</sub> | 1048.7637  | 29.8                       | 1.5                    |
| rhodoheptin I (9)  | C <sub>56</sub> H <sub>104</sub> N <sub>7</sub> O <sub>11</sub> | 1050.7787  | 19.1                       | 28.7                   |
| rhodoheptin J (10) | C <sub>57</sub> H <sub>96</sub> N <sub>7</sub> O <sub>11</sub>  | 1054.7154  | 22.3                       | 4.3                    |

|                                 |                                                                   |           |      |      |
|---------------------------------|-------------------------------------------------------------------|-----------|------|------|
| rhodoheptin K (11)              | C <sub>53</sub> H <sub>98</sub> N <sub>7</sub> O <sub>12</sub> S  | 1056.6981 | 21.8 | 0.4  |
| rhodoheptin L (12)              | C <sub>57</sub> H <sub>98</sub> N <sub>7</sub> O <sub>11</sub>    | 1056.7317 | 28.8 | 21.9 |
| rhodoheptin M (13)              | C <sub>57</sub> H <sub>106</sub> N <sub>7</sub> O <sub>11</sub>   | 1064.7940 | 22.1 | 1.7  |
| rhodoheptin N (14)              | C <sub>58</sub> H <sub>100</sub> N <sub>7</sub> O <sub>11</sub>   | 1070.7470 | 30.4 | 0.9  |
| rhodoheptin O (15)              | C <sub>58</sub> H <sub>106</sub> N <sub>7</sub> O <sub>11</sub>   | 1076.7948 | 14.7 | 0.6  |
| rhodoheptin P (16)              | C <sub>59</sub> H <sub>100</sub> N <sub>7</sub> O <sub>11</sub>   | 1082.7472 | 28.6 | 3.0  |
| rhodoheptin Q (17)              | C <sub>55</sub> H <sub>102</sub> N <sub>7</sub> O <sub>12</sub> S | 1084.7290 | 25.8 | 1.0  |
| rhodoheptin R (18) <sup>b</sup> | C <sub>59</sub> H <sub>102</sub> N <sub>7</sub> O <sub>11</sub>   | 1084.7633 | 15.3 | 4.9  |
| rhodoheptin S (19)              | C <sub>60</sub> H <sub>104</sub> N <sub>7</sub> O <sub>11</sub>   | 1098.7781 | 18.9 | 1.7  |
| rhodoheptin T (20)              | C <sub>60</sub> H <sub>110</sub> N <sub>7</sub> O <sub>11</sub>   | 1104.8262 | 34.8 | 3.3  |
| rhodoheptin U (21)              | C <sub>63</sub> H <sub>108</sub> N <sub>7</sub> O <sub>11</sub>   | 1138.8105 | 32.3 | 7.0  |

---

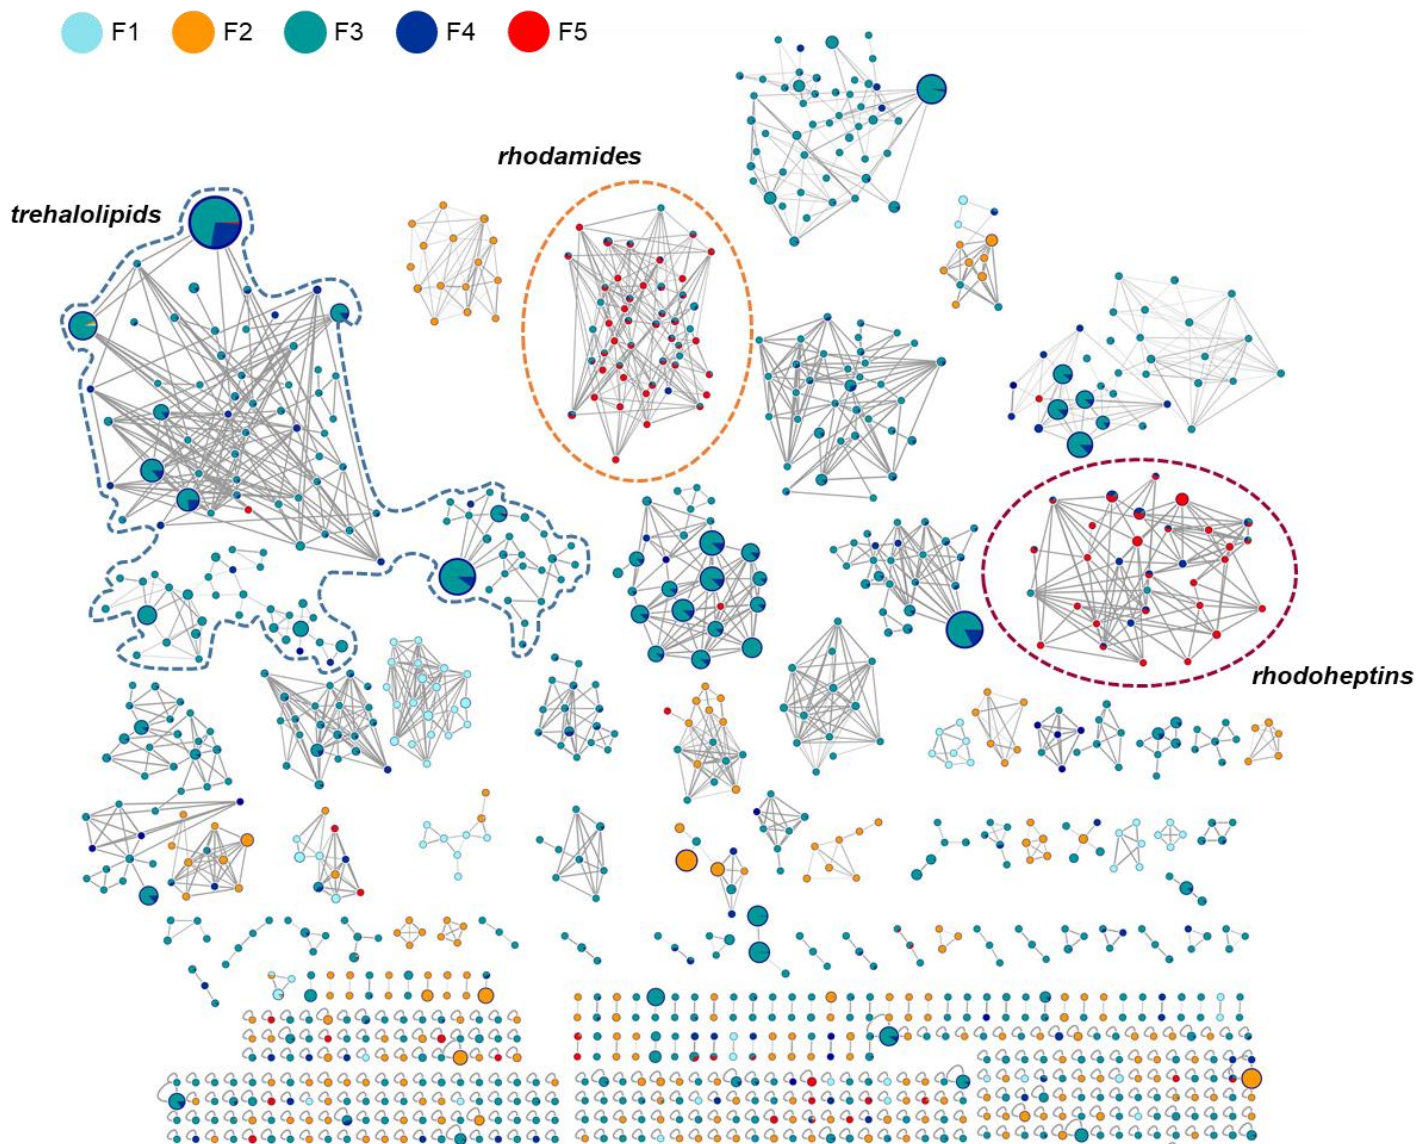

**Figure S1.** Global molecular network of the SPE fractions (F1-F5) from the organic extract of *Rhodococcus* sp. I2R, highlighting biosurfactants produced by the bacterium, i.e. rhodoheptins (dashed red line), rhodamides (dashed orange line), and trehalolipids (dashed blue line). Nodes are visualized as pie charts showing metabolite distribution in SPE fractions. Edge thickness reflects cosine score similarity and node size is related to metabolite amounts (peak area).

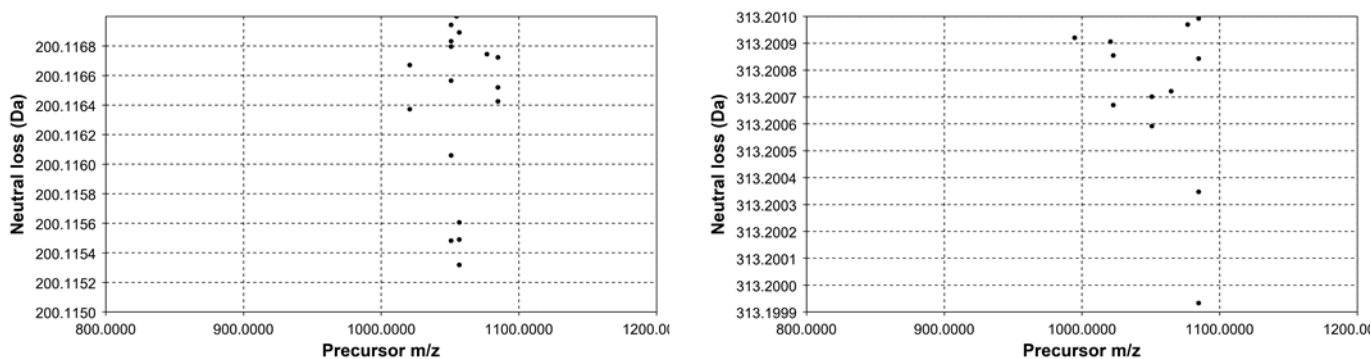

**Figure S2.** Neutral loss/precursor  $m/z$  plots from HR-MS/MS data of the F5 fraction from *Rhodococcus* sp. I2R organic extract. These plots highlight rhodoheptin precursor ions displaying neutral losses of 200.12 amu ( $C_9H_{16}N_2O_3$ , left panel) and 313.20 amu ( $C_{15}H_{27}N_3O_4$ , right panel) corresponding, respectively, to the Thr-Val and Leu-Ser-Ile/Leu motifs, predicted from genomic analysis of the *rhd* gene cluster.

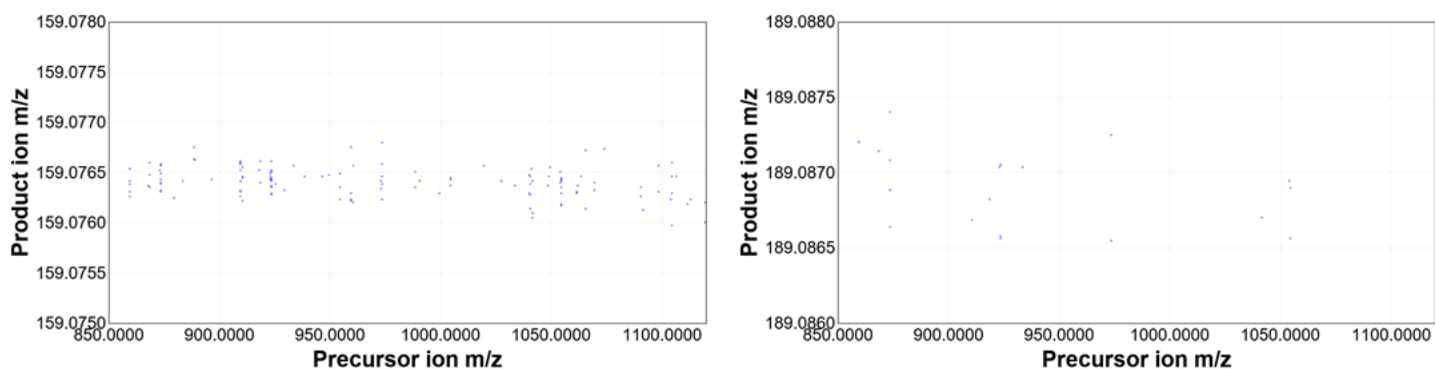

**Figure S3.** Product ion/precursor  $m/z$  plots from HR-MS/MS data of the F5 fraction from *Rhodococcus* sp. I2R organic extract. These plots highlight rhodamide precursor ions displaying fragment ions at  $m/z$  159.076 ( $C_6H_{11}N_2O_3^+$ , left panel) and 189.087 ( $C_7H_{13}N_2O_4^+$ , right panel) corresponding, respectively, to the Ser-Ala and Thr-Ser motifs predicted from genomic analysis of the *rmd* gene cluster.

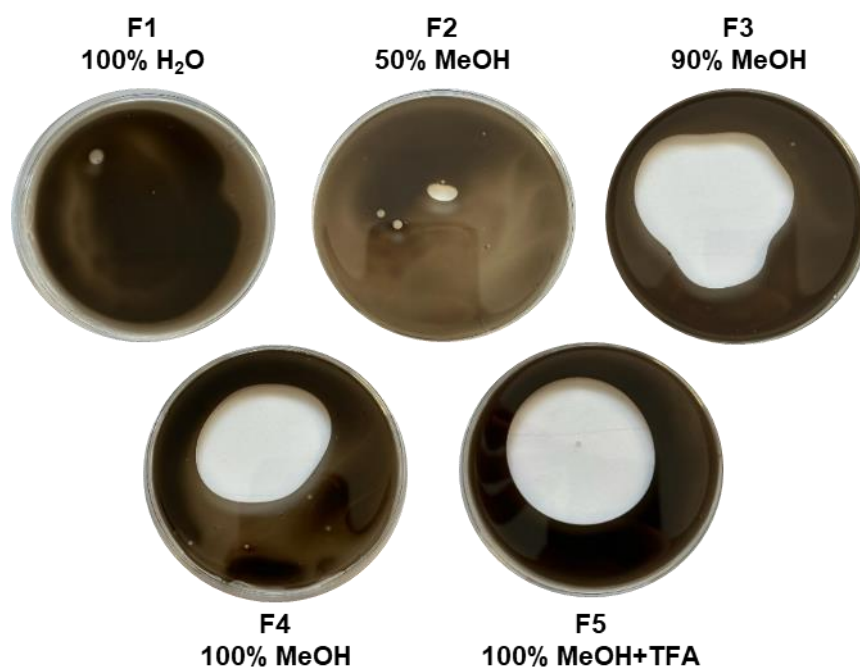

**Figure S4.** Oil-spreading assay to assess biosurfactant activity of the SPE fractions F1-F5 from the organic extract of *Rhodococcus* sp. I2R. 1  $\mu$ L of each fraction (50 mg/mL) was placed onto the center of the oil layer. The presence of biosurfactants was indicated by formation of a clear zone in the oil layer.

### rhodoheptin A (1)

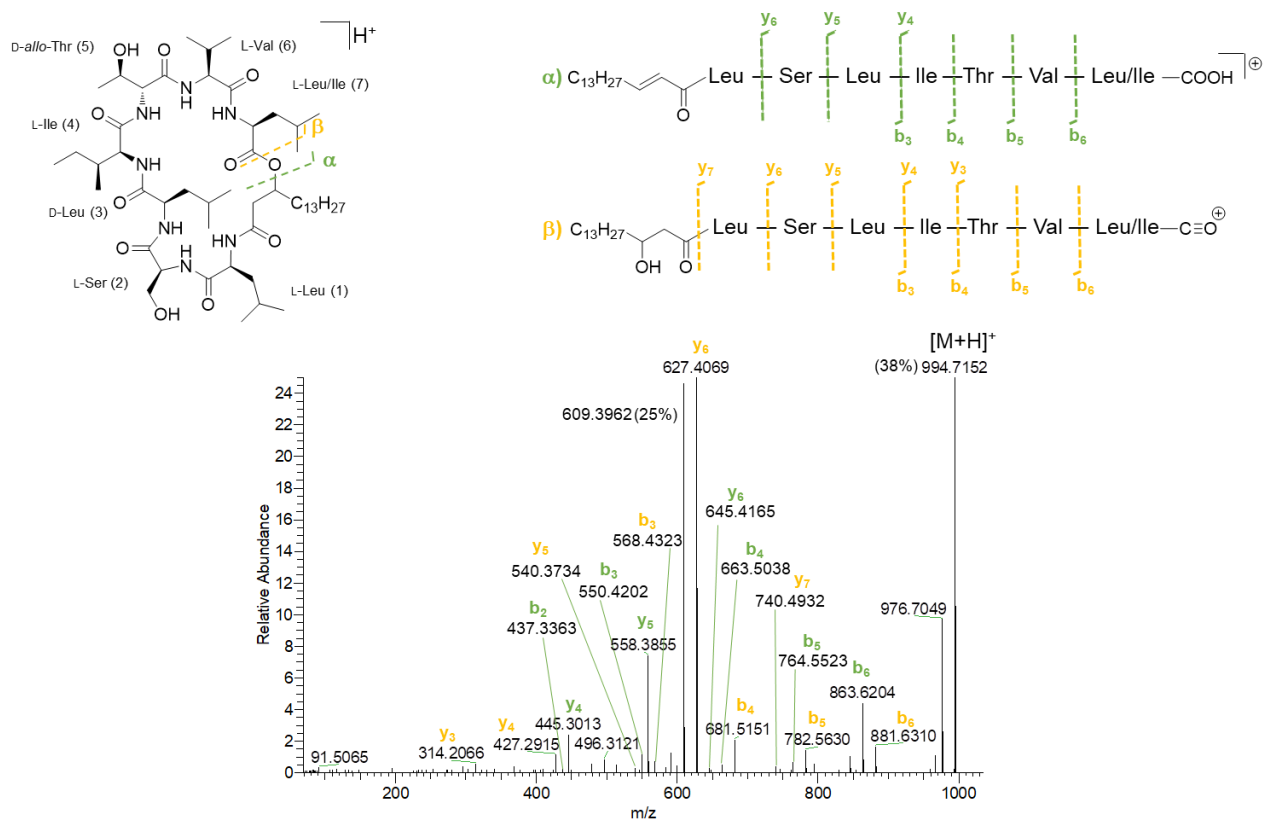

Figure S5. HR-MS<sup>2</sup> spectra of the [M+H]<sup>+</sup> pseudomolecular ion of rhodoheptin A (1).

### rhodoheptin B (2)

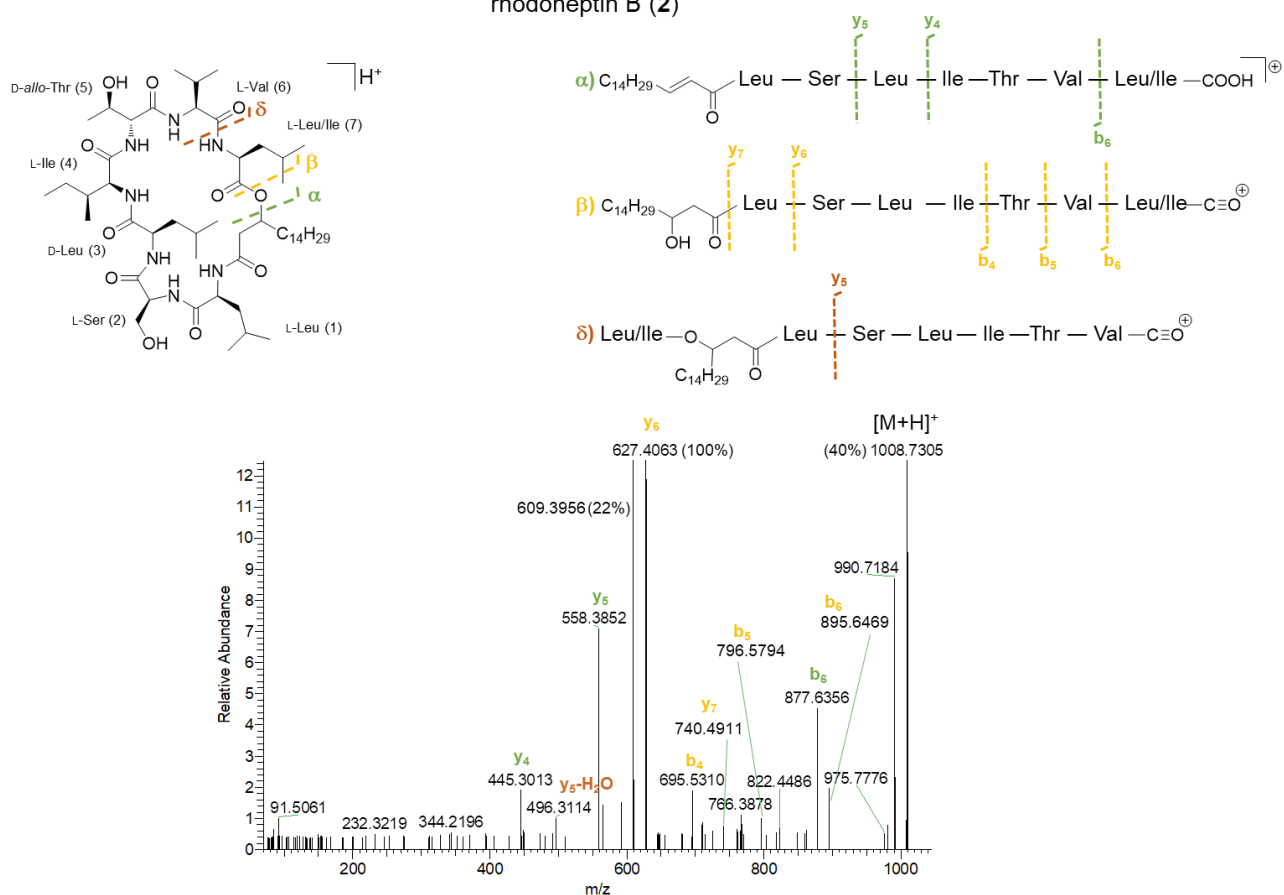

Figure S6. HR-MS<sup>2</sup> spectra of the [M+H]<sup>+</sup> pseudomolecular ion of rhodoheptin B (2).

### rhodoheptin C (3)

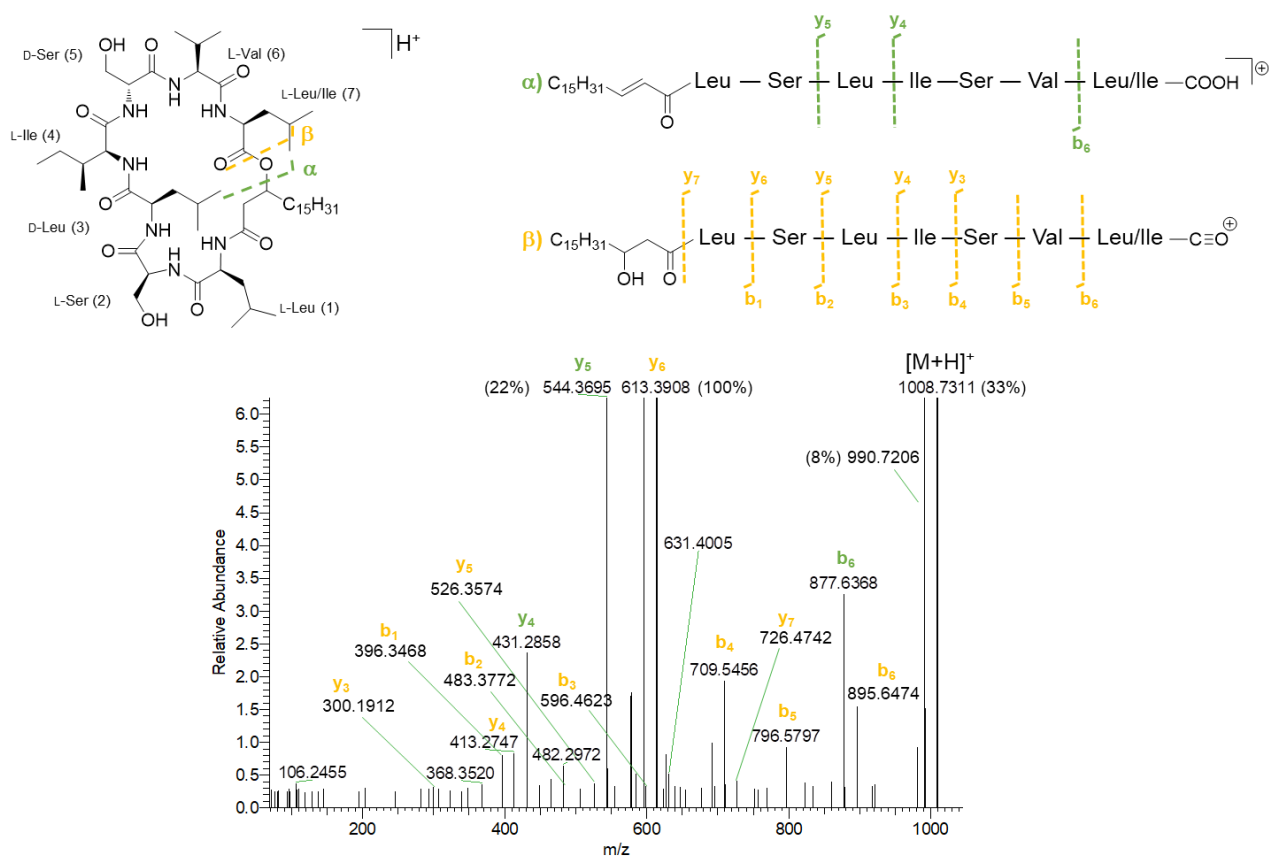

Figure S7. HR-MS<sup>2</sup> spectra of the  $[M+H]^+$  pseudomolecular ion of rhodoheptin C (3).

### rhodoheptin D (4)

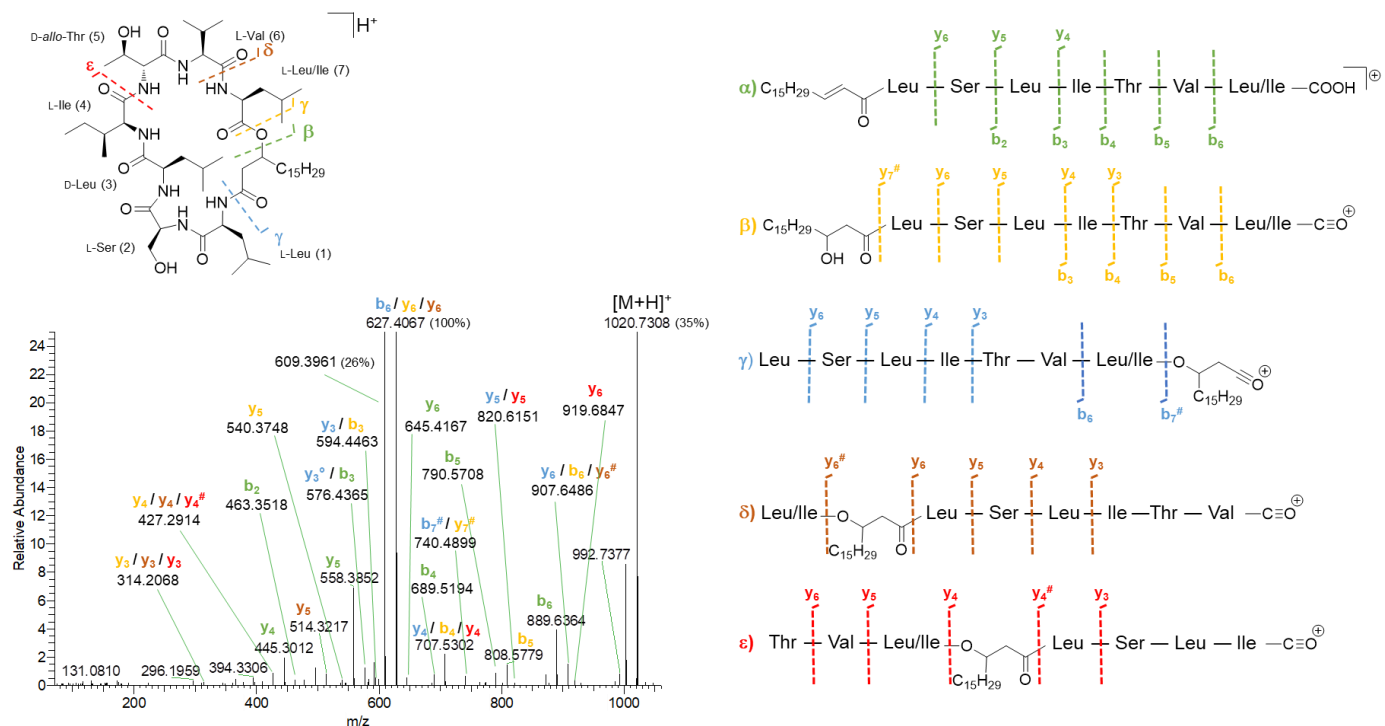

Figure S8. HR-MS<sup>2</sup> spectra of the  $[M+H]^+$  pseudomolecular ion of rhodoheptin D (4).



### rhodoheptin F (6)

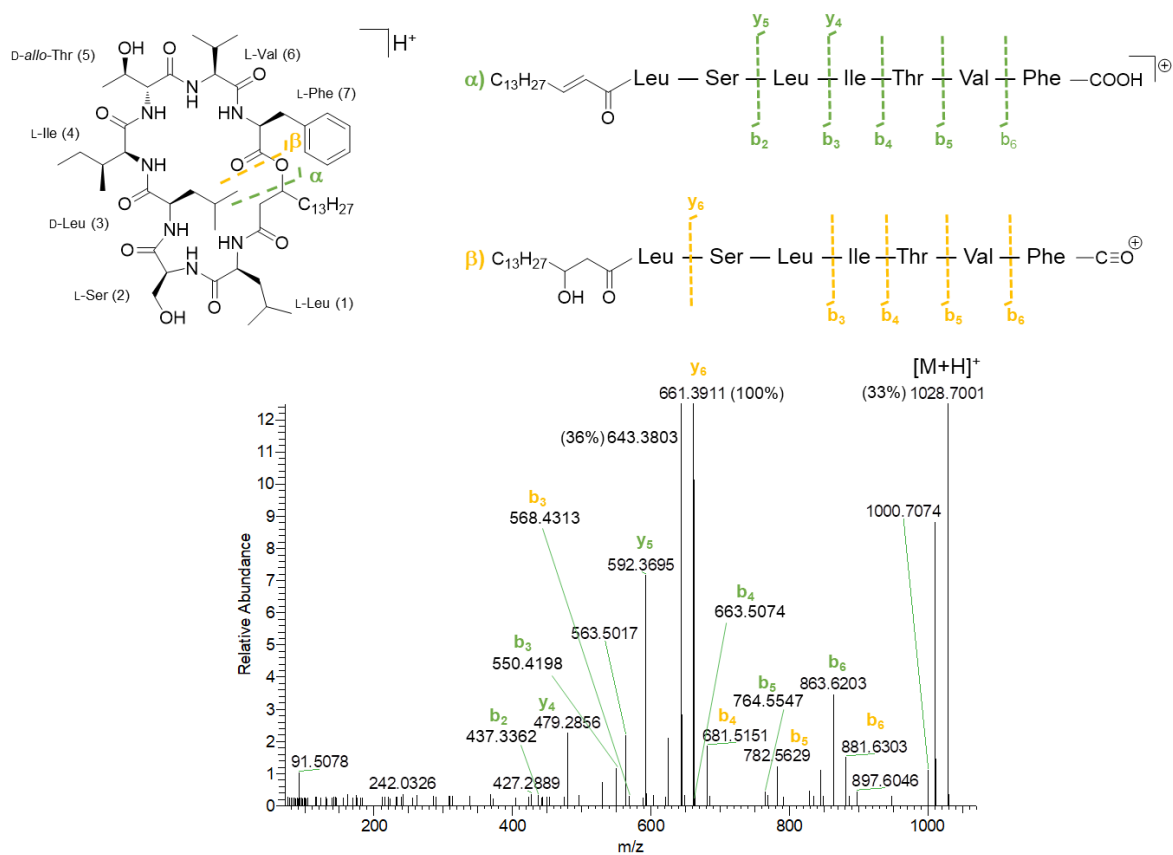

### rhodoheptin G (7)

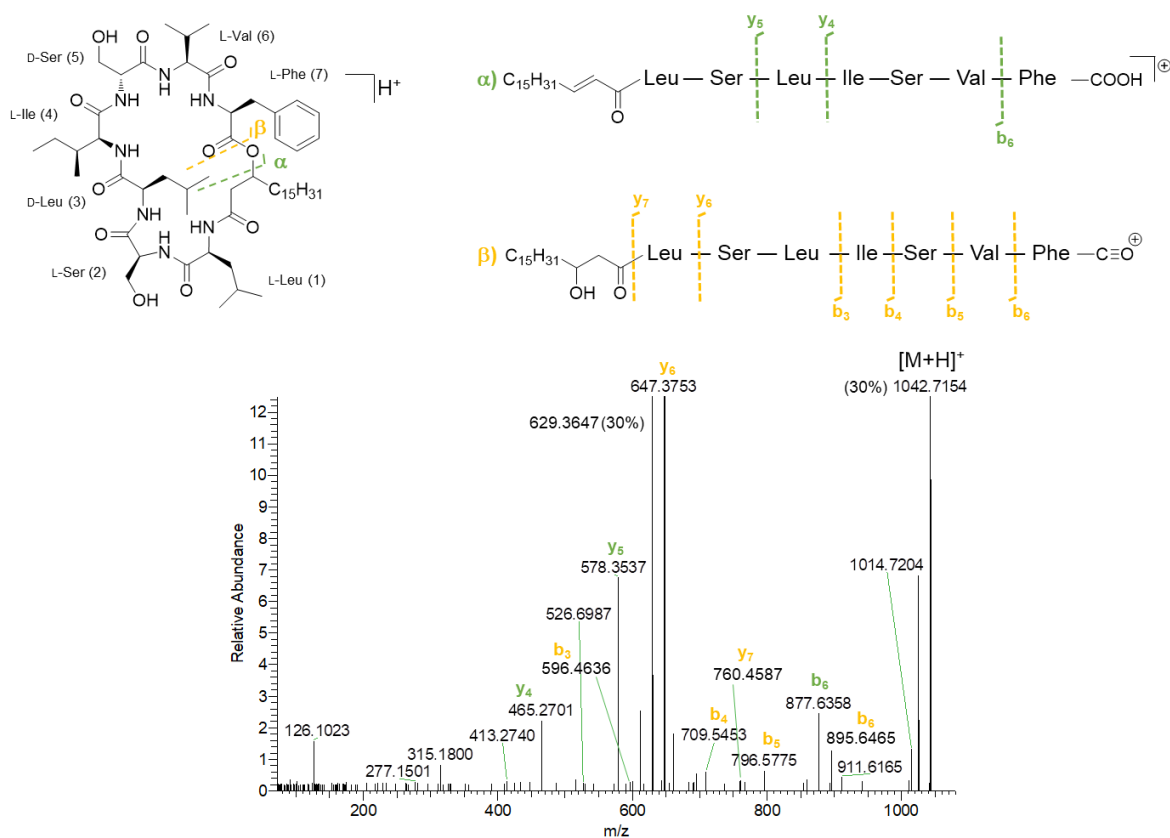

rhodoheptin H (8)

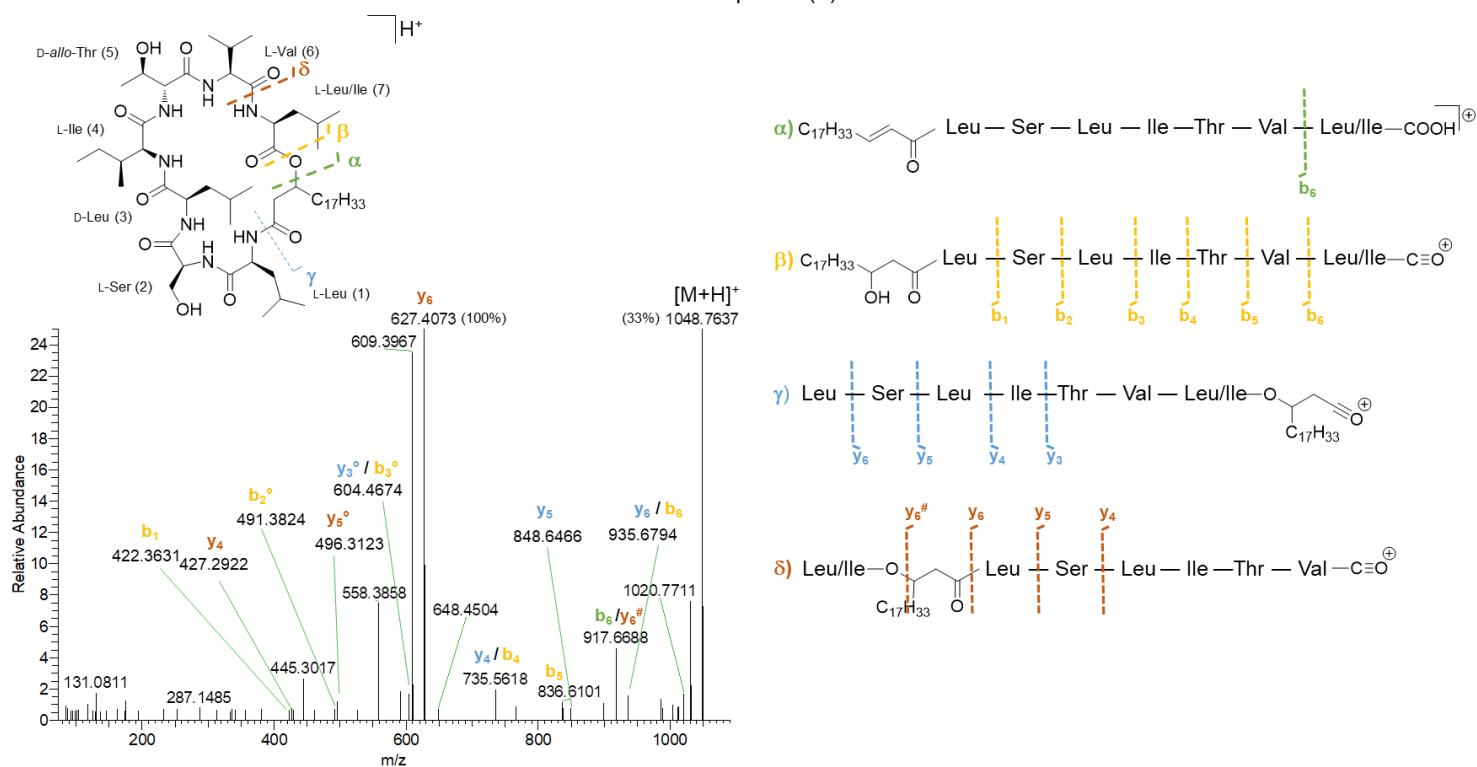

Figure S11. HR-MS<sup>2</sup> spectra of the [M+H]<sup>+</sup> pseudomolecular ion of rhodoheptin H (8).

rhodoheptin I (9)

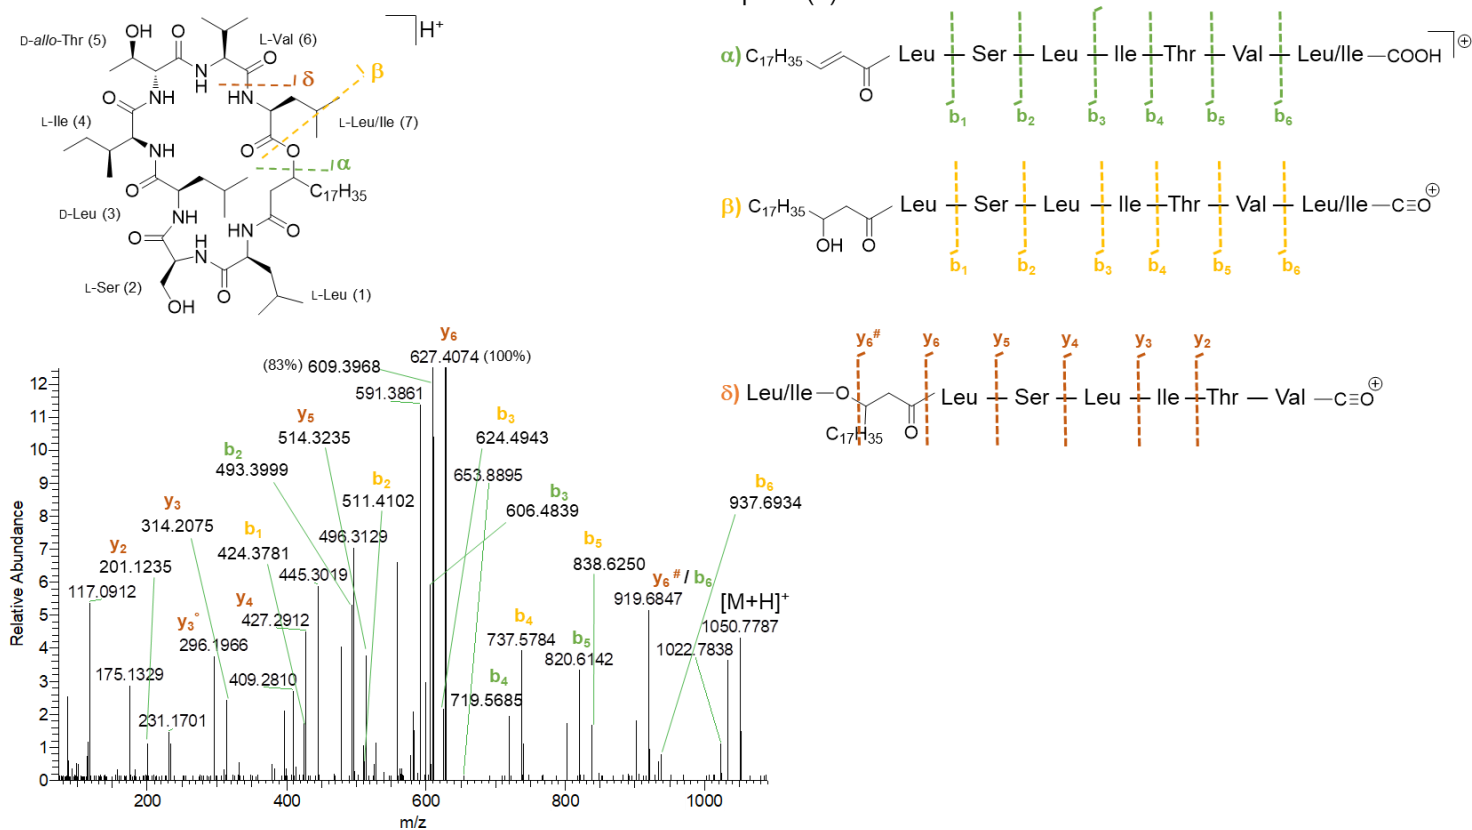

Figure S12. HR-MS<sup>2</sup> spectra of the [M+H]<sup>+</sup> pseudomolecular ion of rhodoheptin I (9).

rhodoheptin J (10)

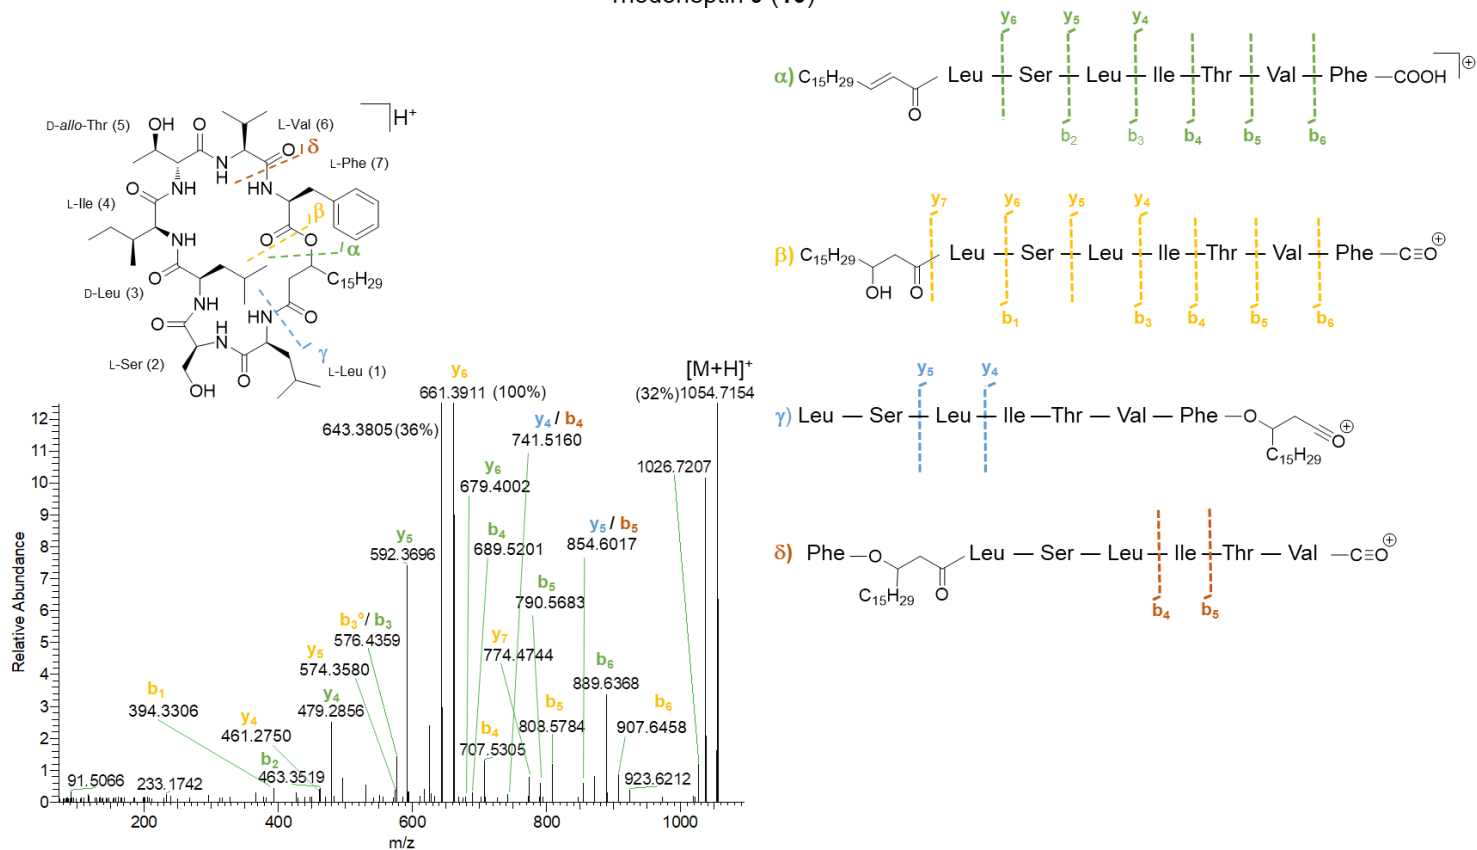

Figure S13. HR-MS<sup>2</sup> spectra of the [M+H]<sup>+</sup> pseudomolecular ion of rhodoheptin J (10).

rhodoheptin K (11)

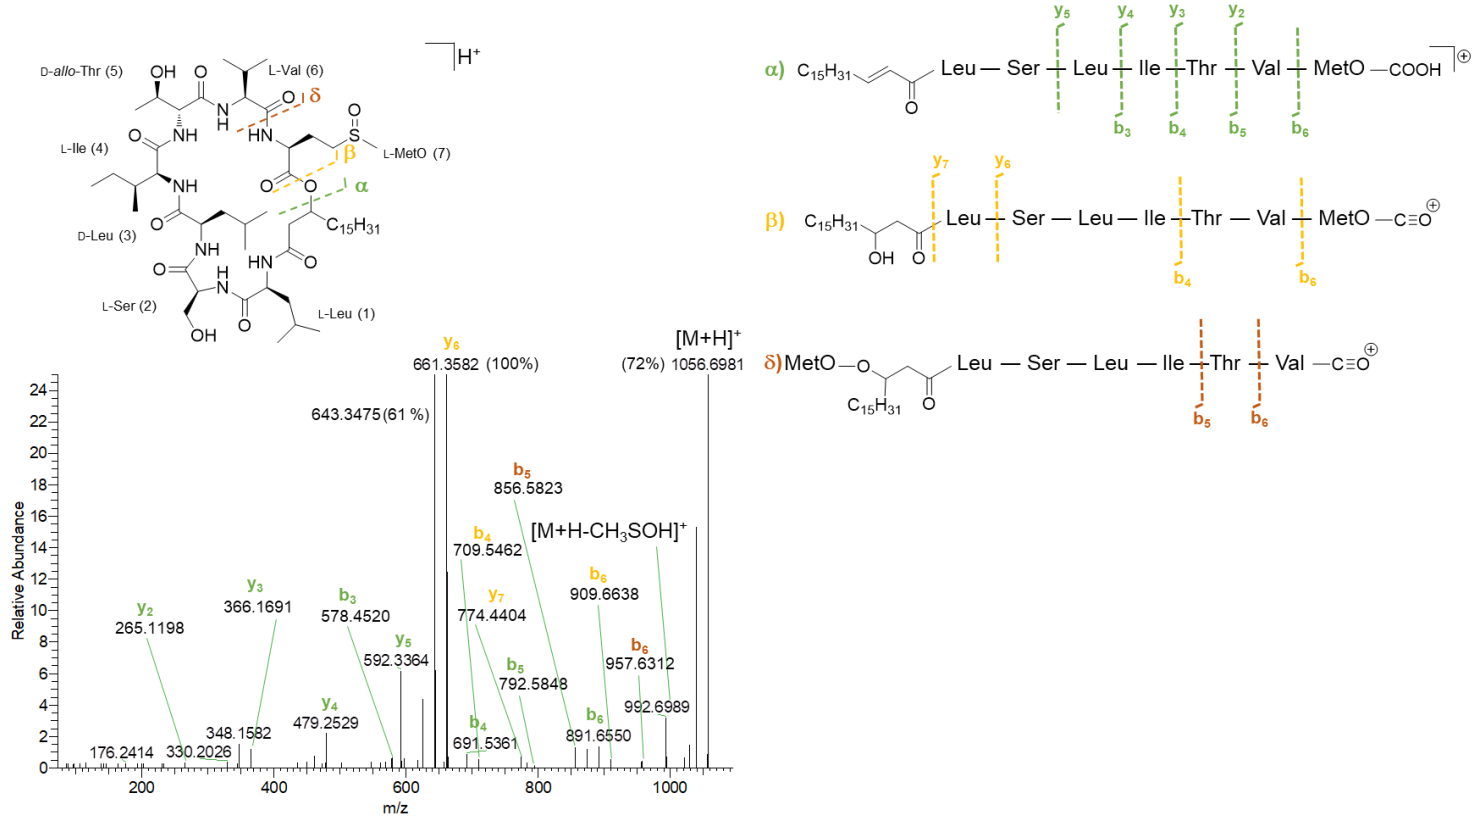

Figure S14. HR-MS<sup>2</sup> spectra of the [M+H]<sup>+</sup> pseudomolecular ion of rhodoheptin K (11).

rhodoheptin L (12)

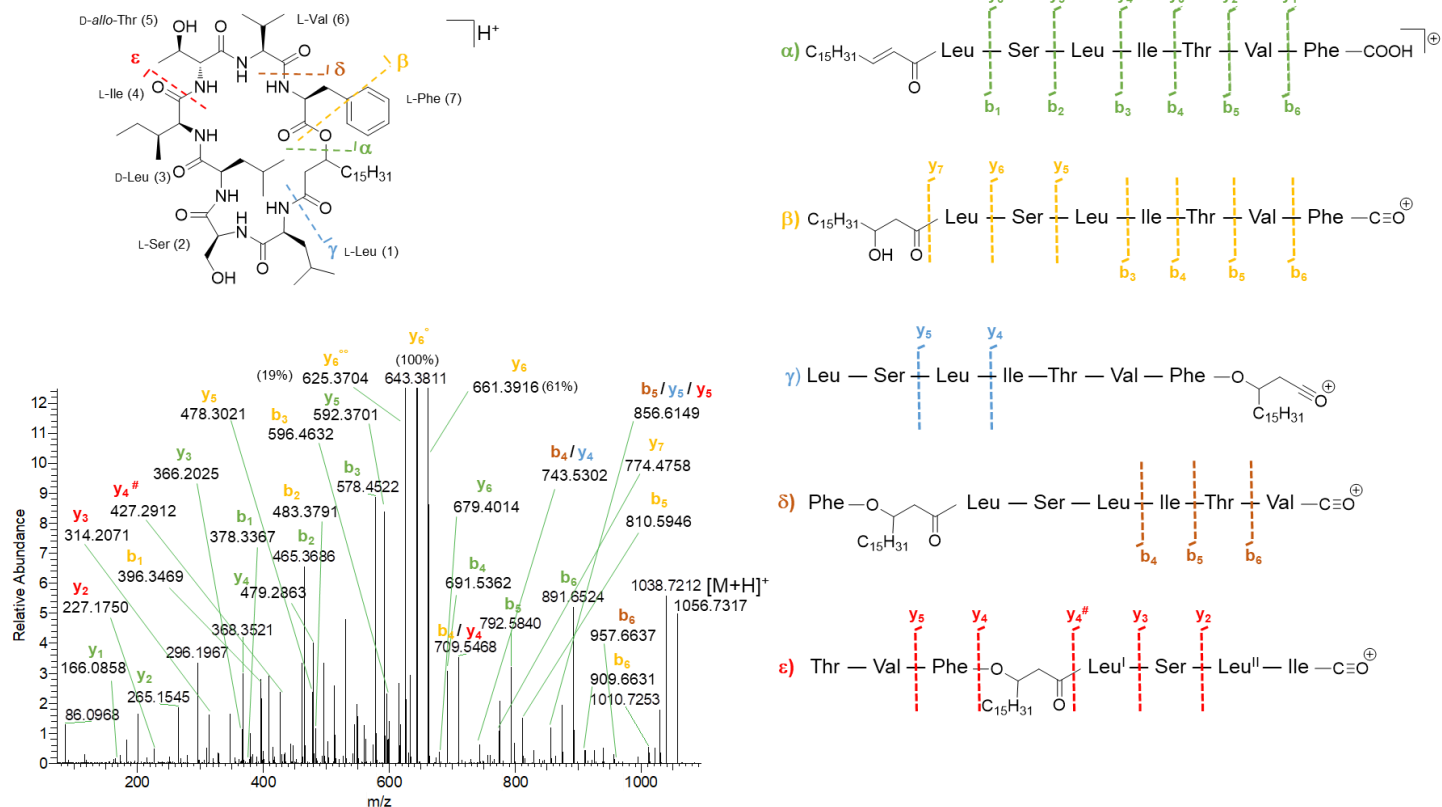

Figure S15. HR-MS<sup>2</sup> spectra of the [M+H]<sup>+</sup> pseudomolecular ion of rhodoheptin L (12).

rhodoheptin M (13)

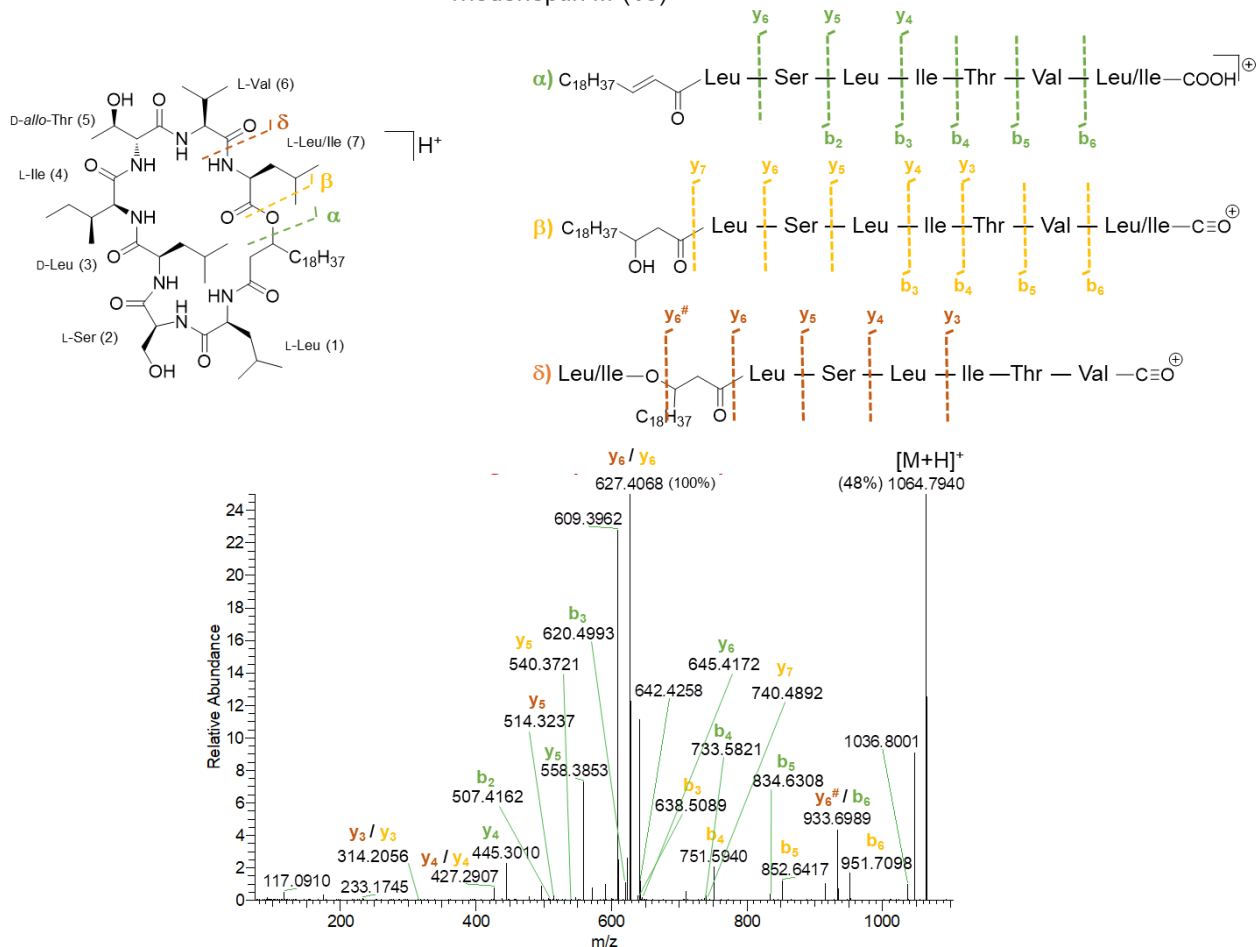

Figure S16. HR-MS<sup>2</sup> spectra of the [M+H]<sup>+</sup> pseudomolecular ion of rhodoheptin M (13).

rhodoheptin N (14)

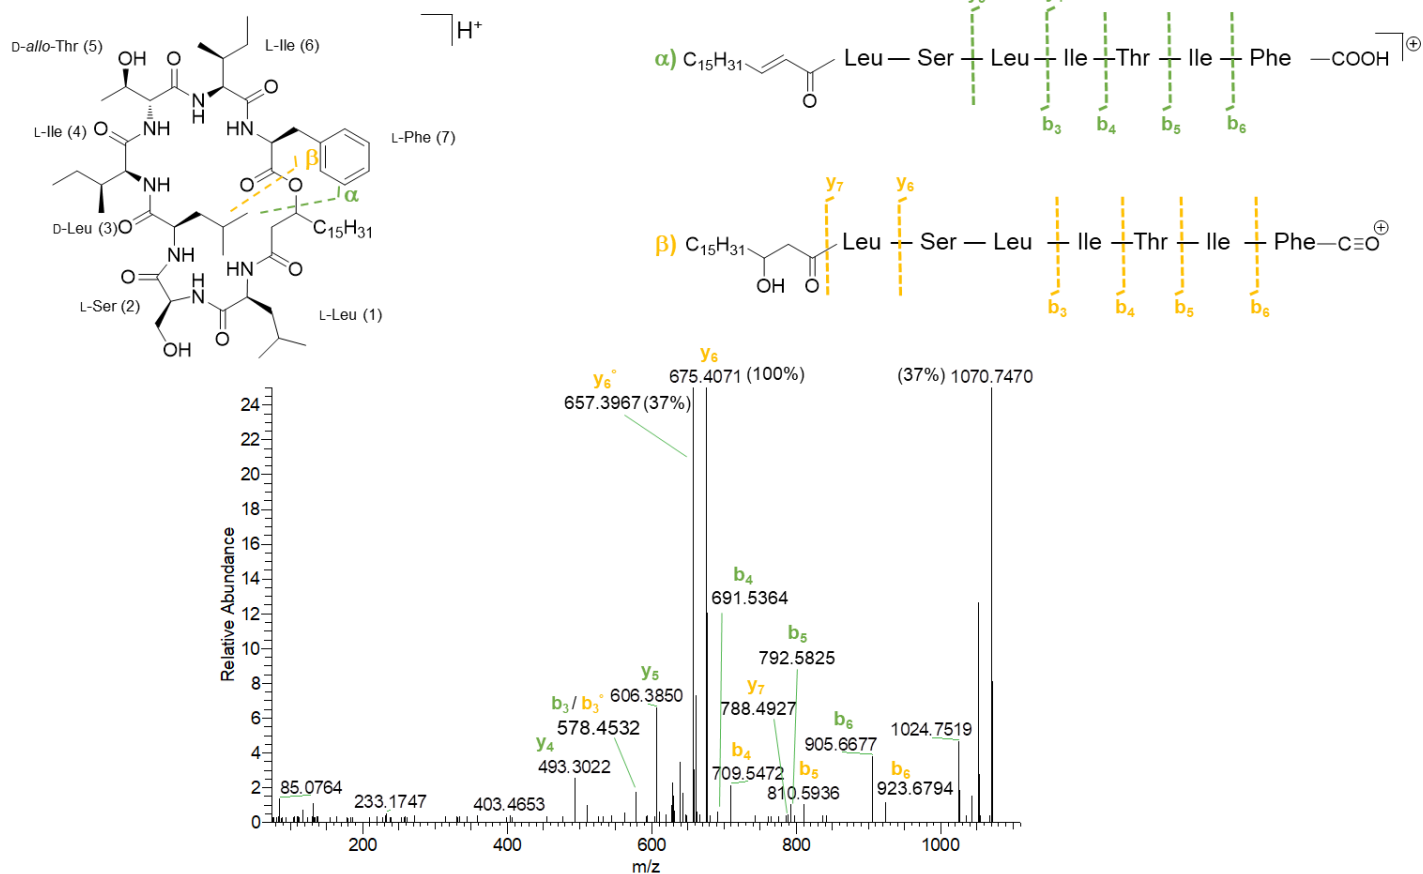

Figure S17. HR-MS<sup>2</sup> spectra of the  $[M+H]^+$  pseudomolecular ion of rhodoheptin N (14).

rhodoheptin O (15)

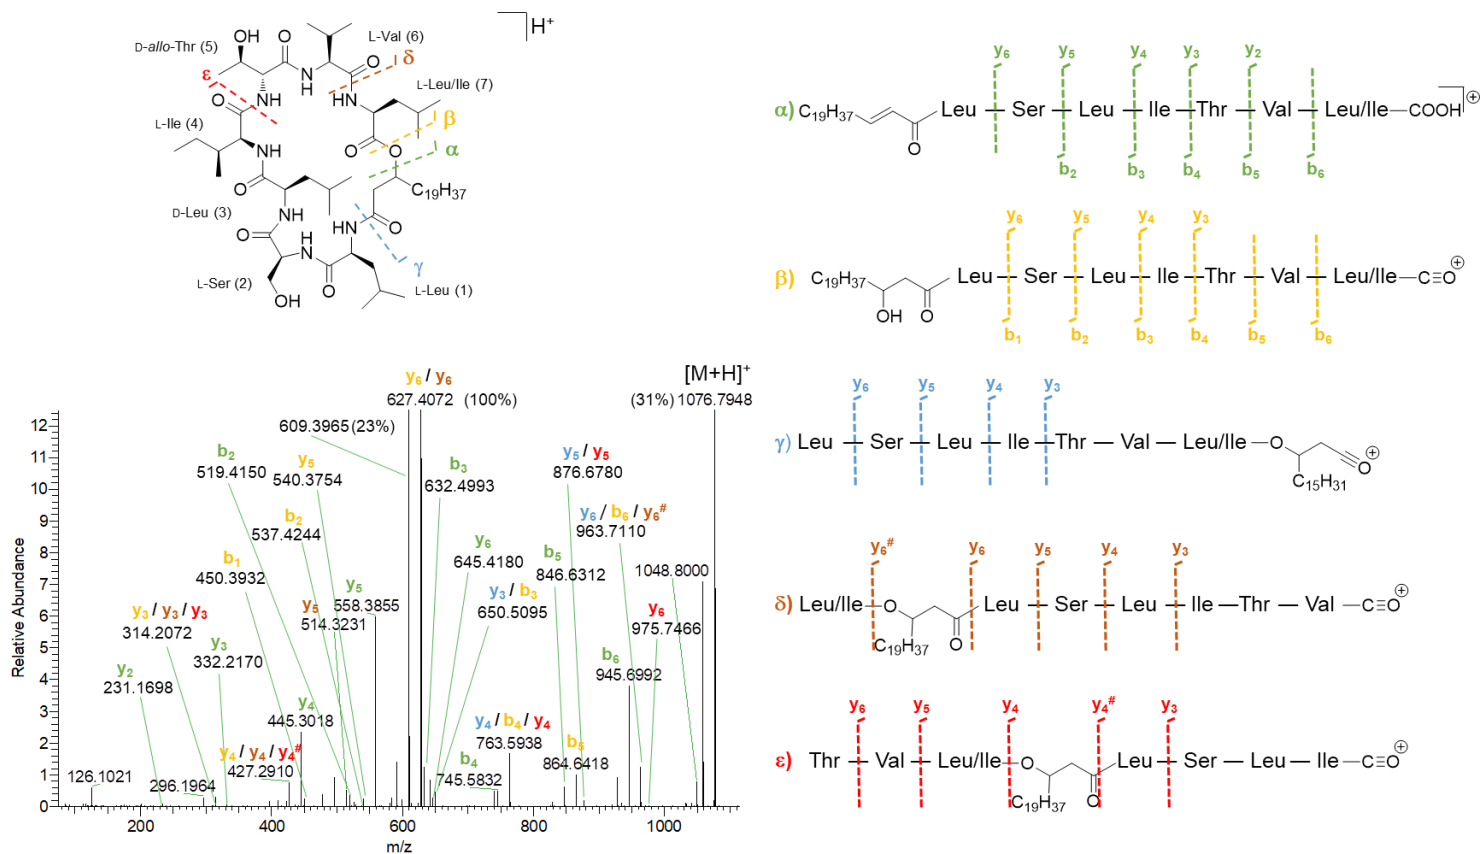

Figure S18. HR-MS<sup>2</sup> spectra of the  $[M+H]^+$  pseudomolecular ion of rhodoheptin O (15).

### rhodoheptin P (16)

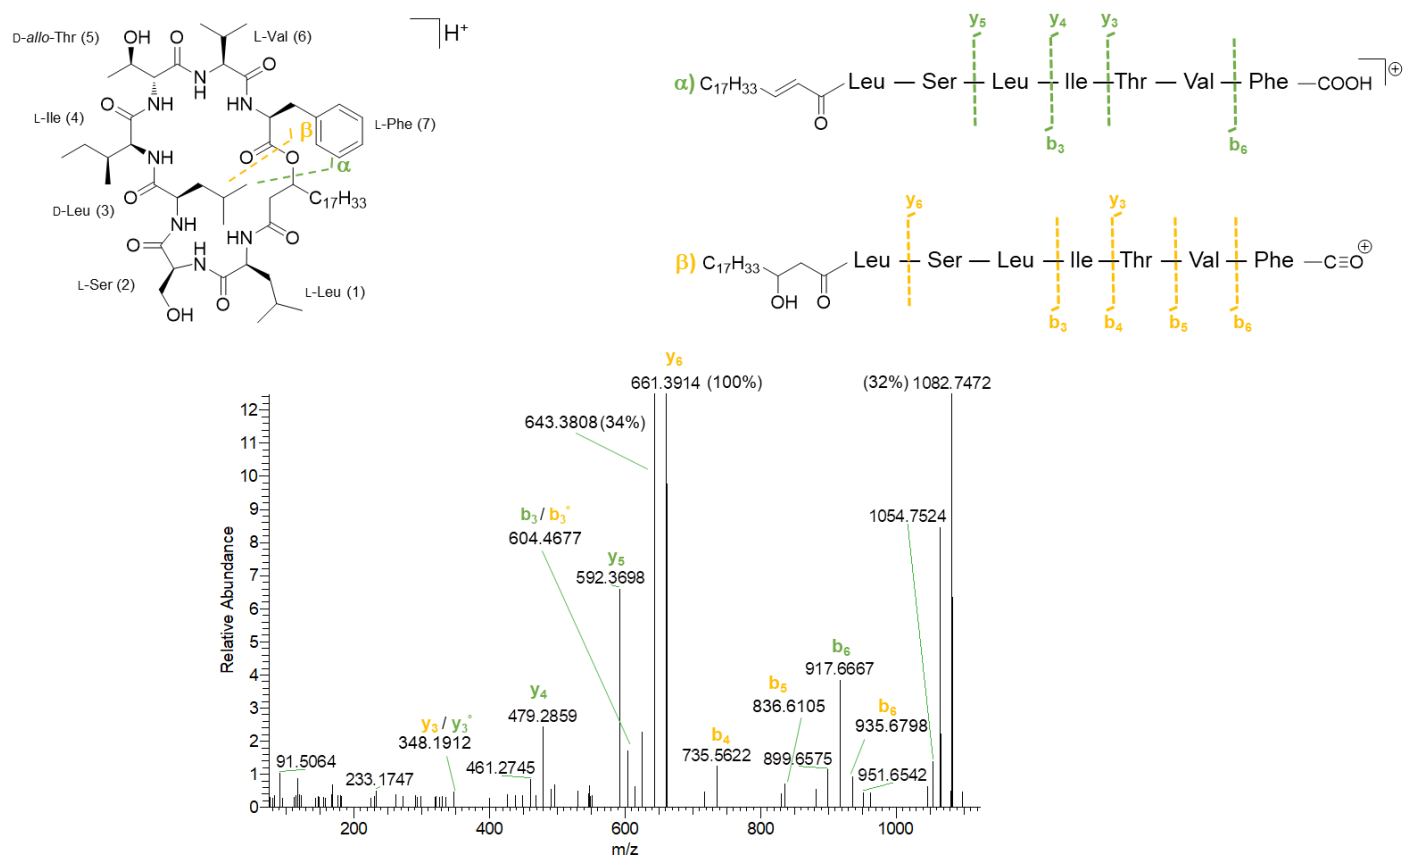

Figure S19. HR-MS<sup>2</sup> spectra of the [M+H]<sup>+</sup> pseudomolecular ion of rhodoheptin P (16).

### rhodoheptin Q (17)

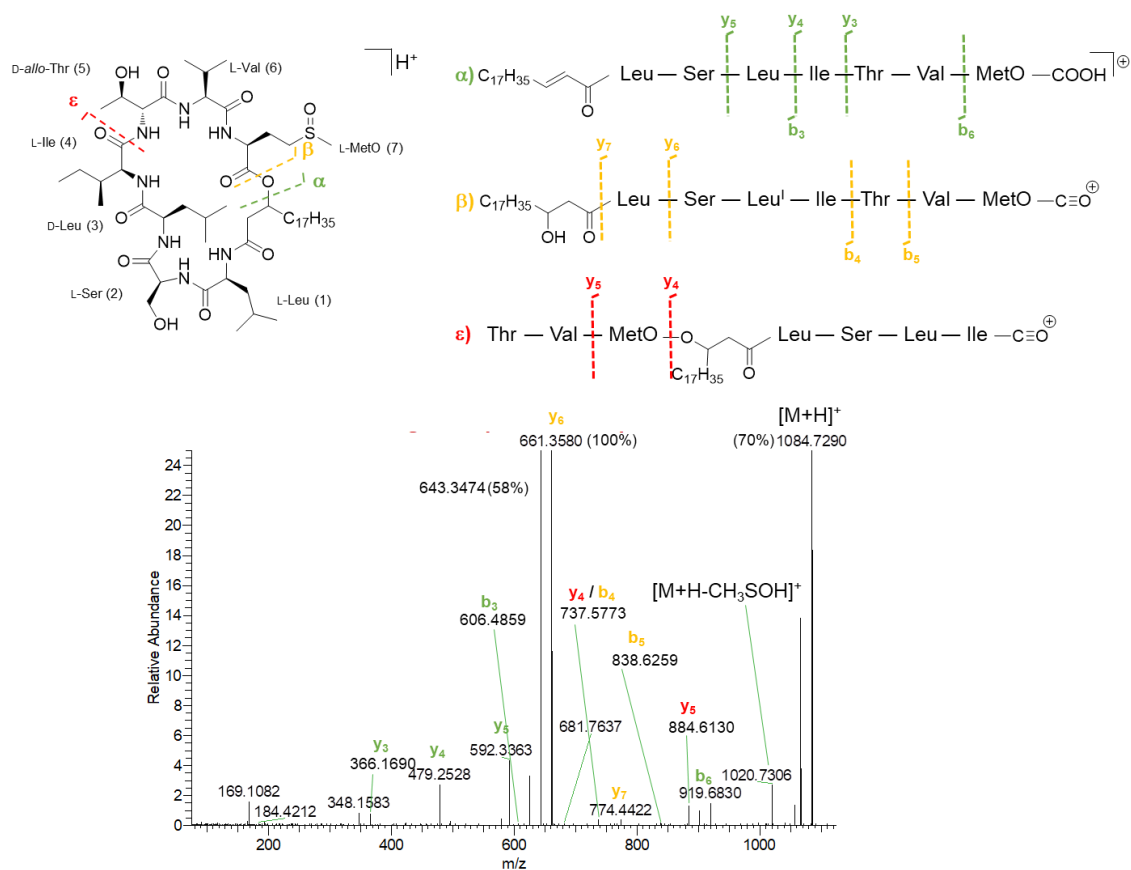

Figure S20. HR-MS<sup>2</sup> spectra of the [M+H]<sup>+</sup> pseudomolecular ion of rhodoheptin Q (17).

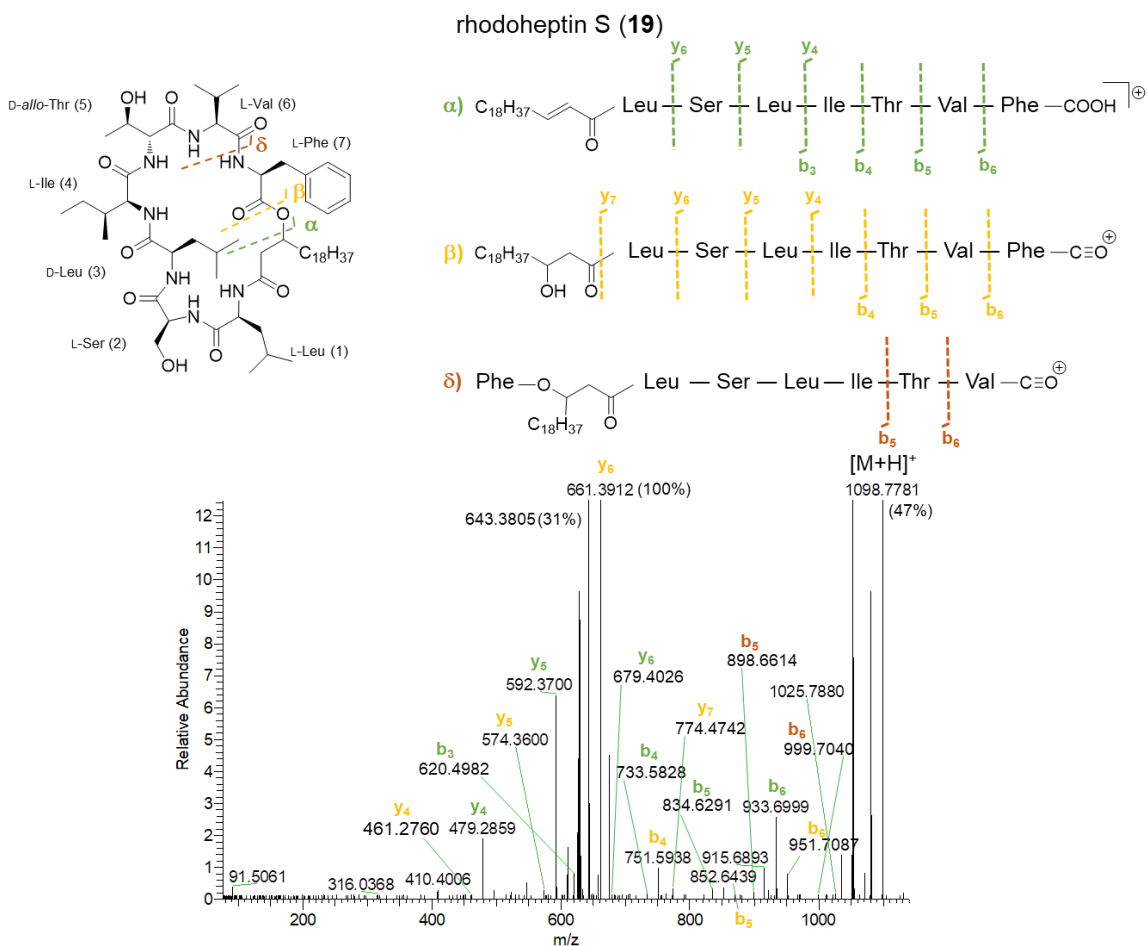

**Figure S21.** HR-MS<sup>2</sup> spectra of the [M+H]<sup>+</sup> pseudomolecular ion of rhodoheptin S (19).

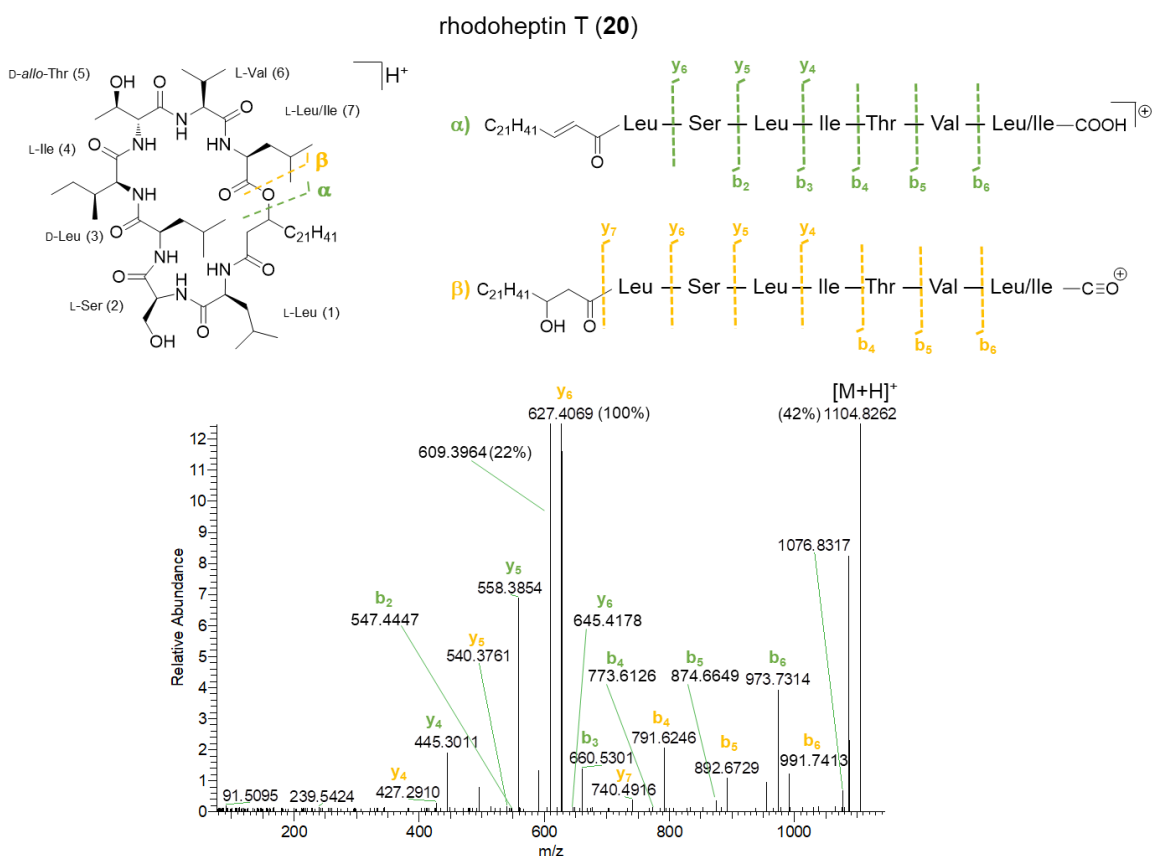

**Figure S22.** HR-MS<sup>2</sup> spectra of the [M+H]<sup>+</sup> pseudomolecular ion of rhodoheptin T (20).

### rhodoheptin U (21)

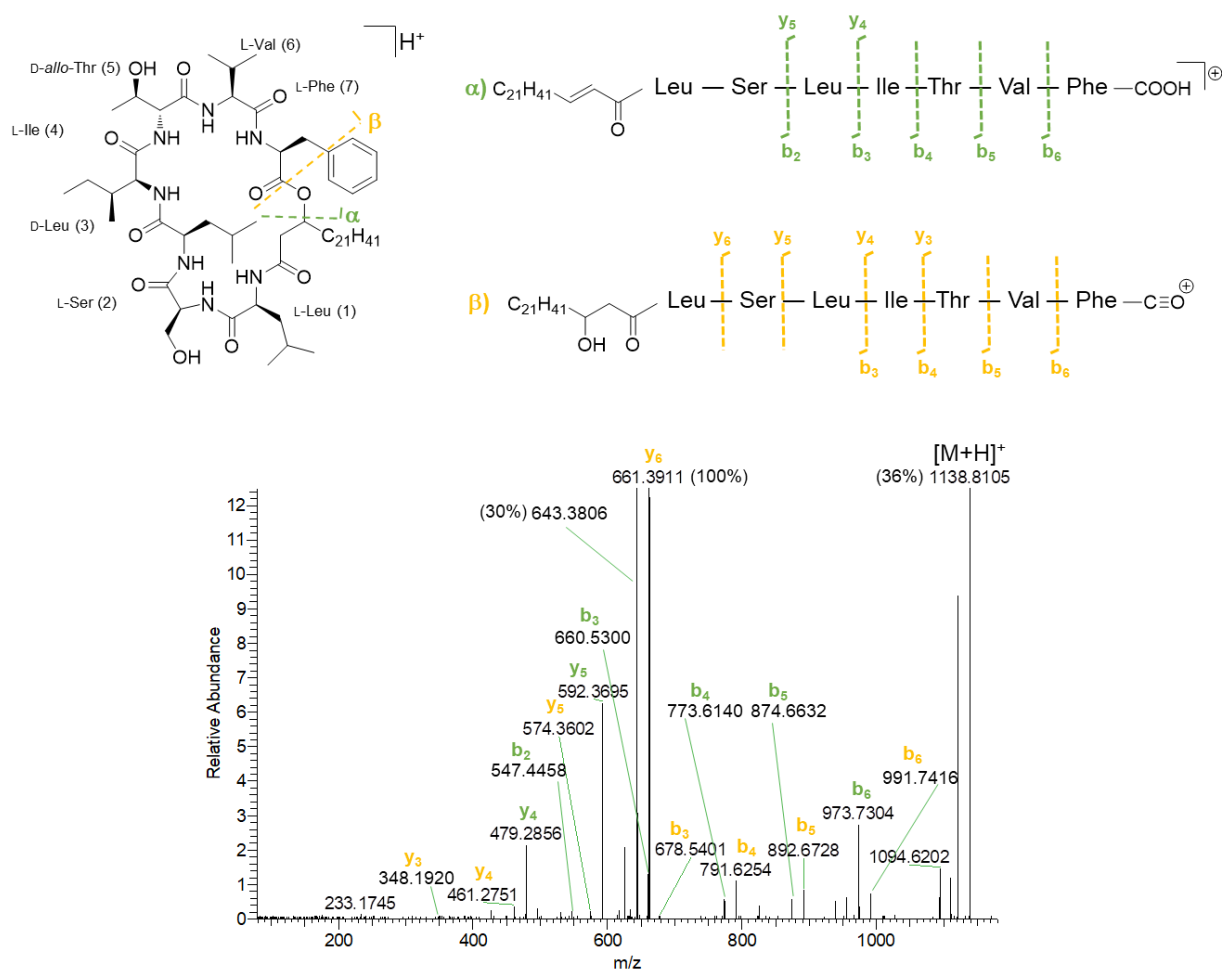

Figure S23. HR-MS<sup>2</sup> spectra of the [M+H]<sup>+</sup> pseudomolecular ion of rhodoheptin U (21).

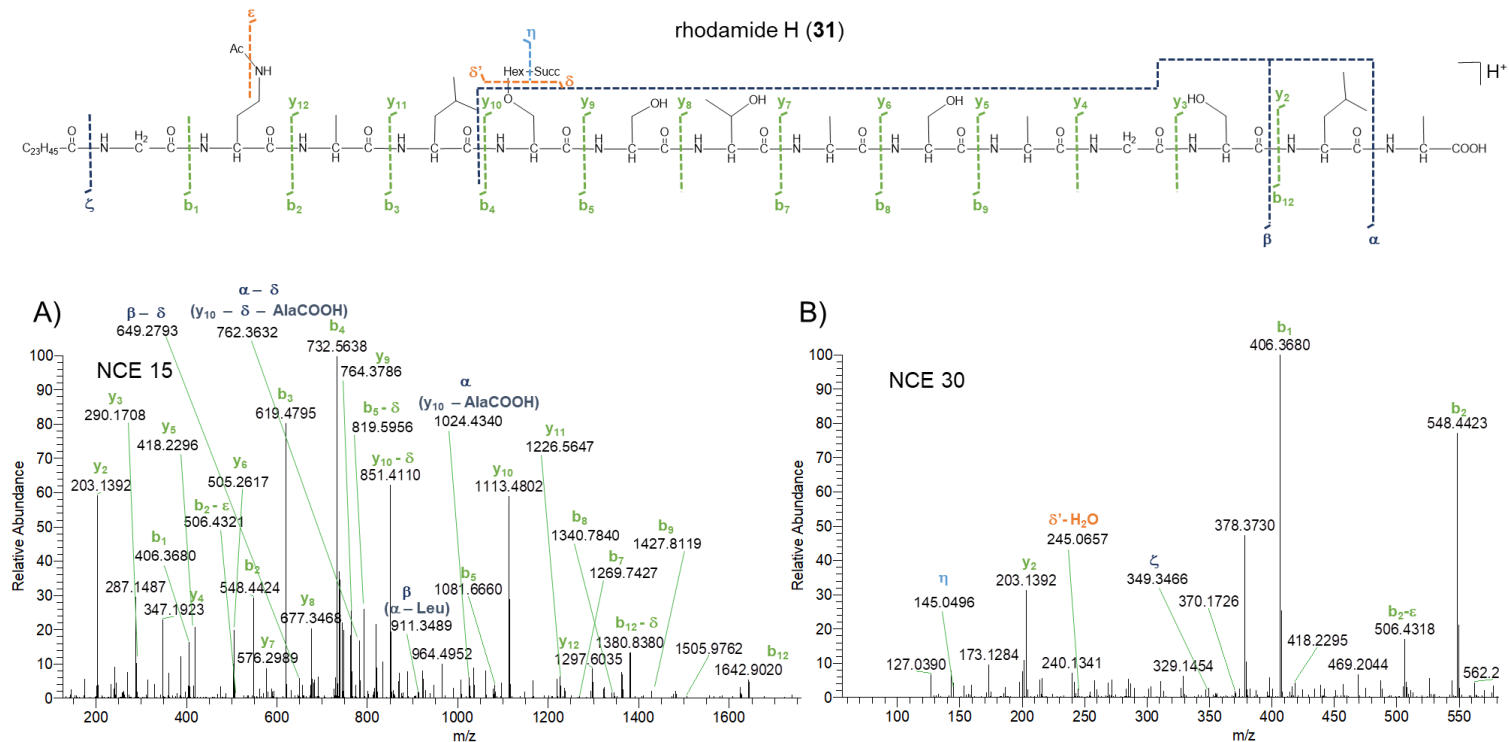

Figure S24. HR-MS<sup>2</sup> spectra of the [M+2H]<sup>2+</sup> pseudomolecular ion of rhodamide H (31) acquired at NCE 15 (A) and 30 (B). Hex = hexosyl; Succ = succinyl; Ac = acetyl.



rhodamide P (40)

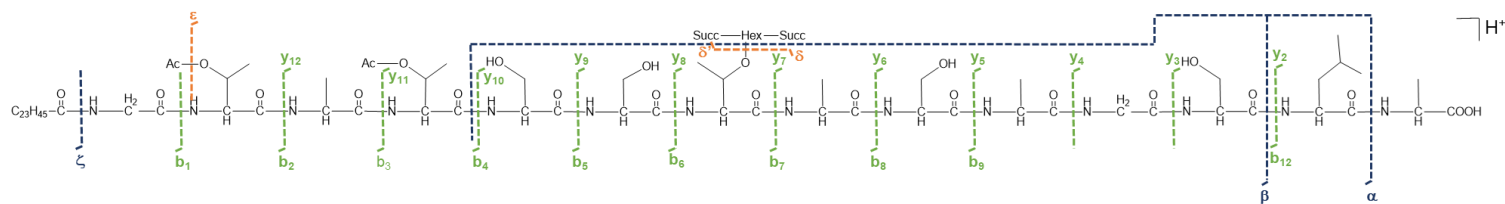

A) NCE 15

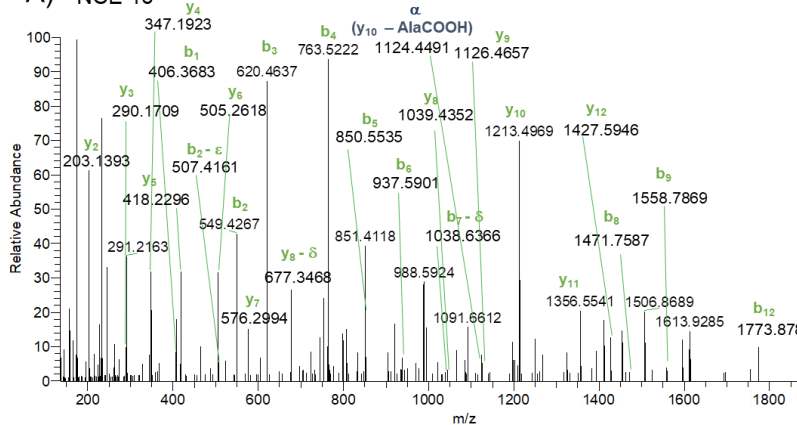

B) NCE 15

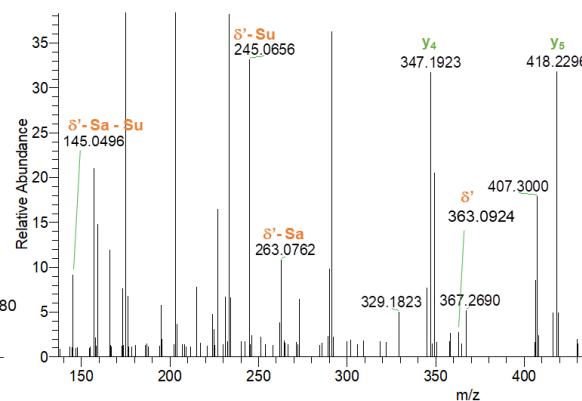

**Figure S25.** HR-MS<sup>2</sup> spectrum of the [M+2H]<sup>2+</sup> pseudomolecular ion of rhodamide P (40) acquired at NCE 15 (A). Zoom in HR-MS<sup>2</sup> spectrum of the [M+2H]<sup>2+</sup> pseudomolecular ion of rhodamide P (40) acquired at NCE 15 over the *m/z* range 140-430 (B). Hex = hexosyl; Succ = succinyl; Ac = acetyl; Sa, succinic anhydride; Su, succinic acid.

isorhodamide E (28)

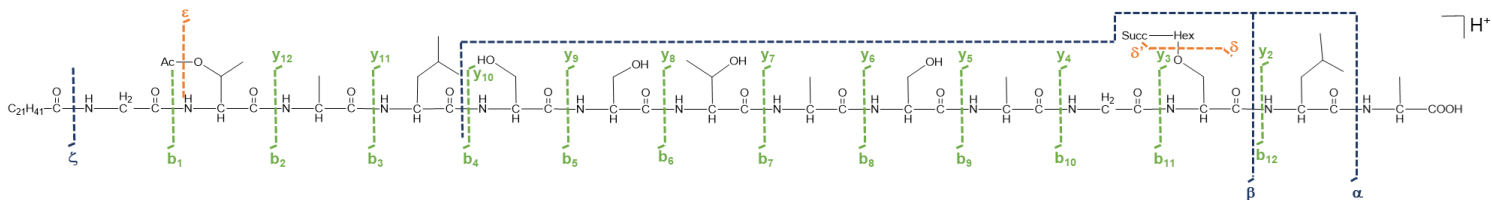

A) NCE 15

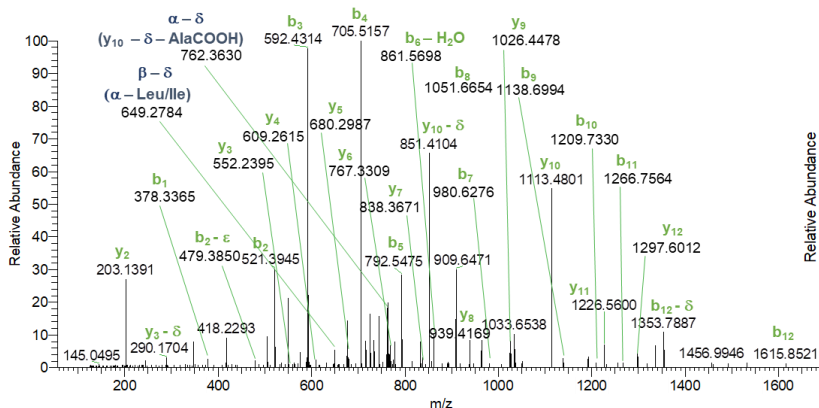

B) NCE 30

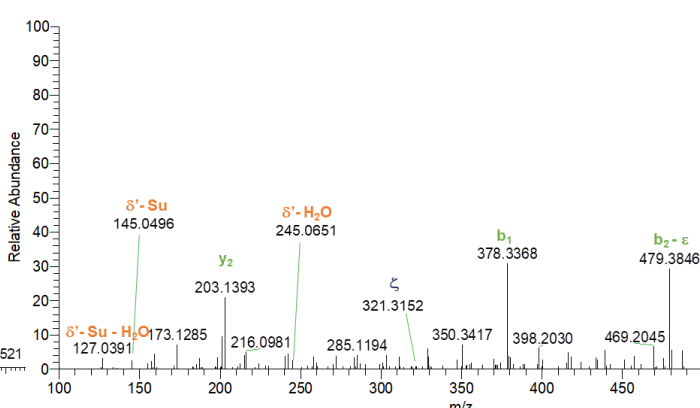

**Figure S26.** HR-MS<sup>2</sup> spectrum of the [M+2H]<sup>2+</sup> pseudomolecular ion of isorhodamide E (28) acquired at NCE 15 (A). Zoom in HR-MS<sup>2</sup> spectrum of the [M+2H]<sup>2+</sup> pseudomolecular ion of isorhodamide E (28) acquired at NCE 30 over the *m/z* range 100-500 (B). Hex = hexosyl; Succ = succinyl; Ac = acetyl; Su, succinic acid.

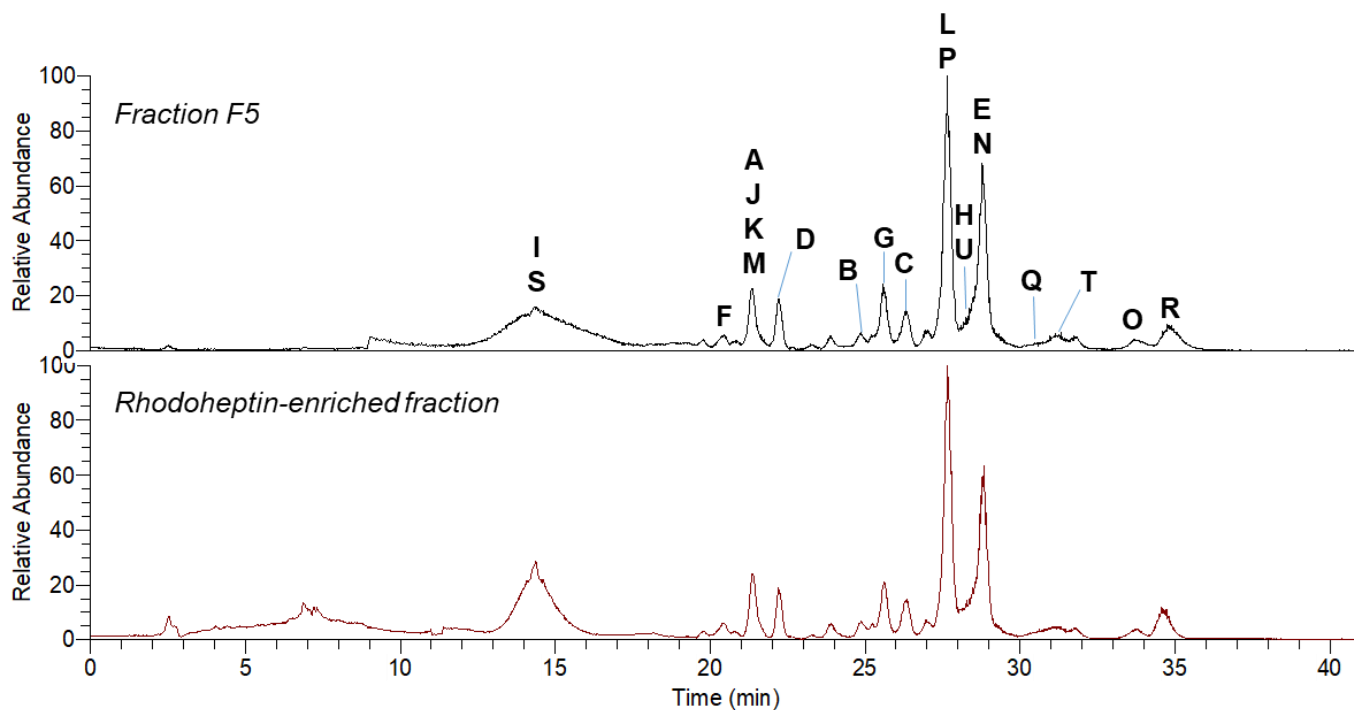

**Figure S27.** Extracted LC-MS ion chromatograms (using a 5 ppm mass tolerance window) for rhodoheptins A-U from the F5 fraction and the purified rhodoheptin-enriched fraction.

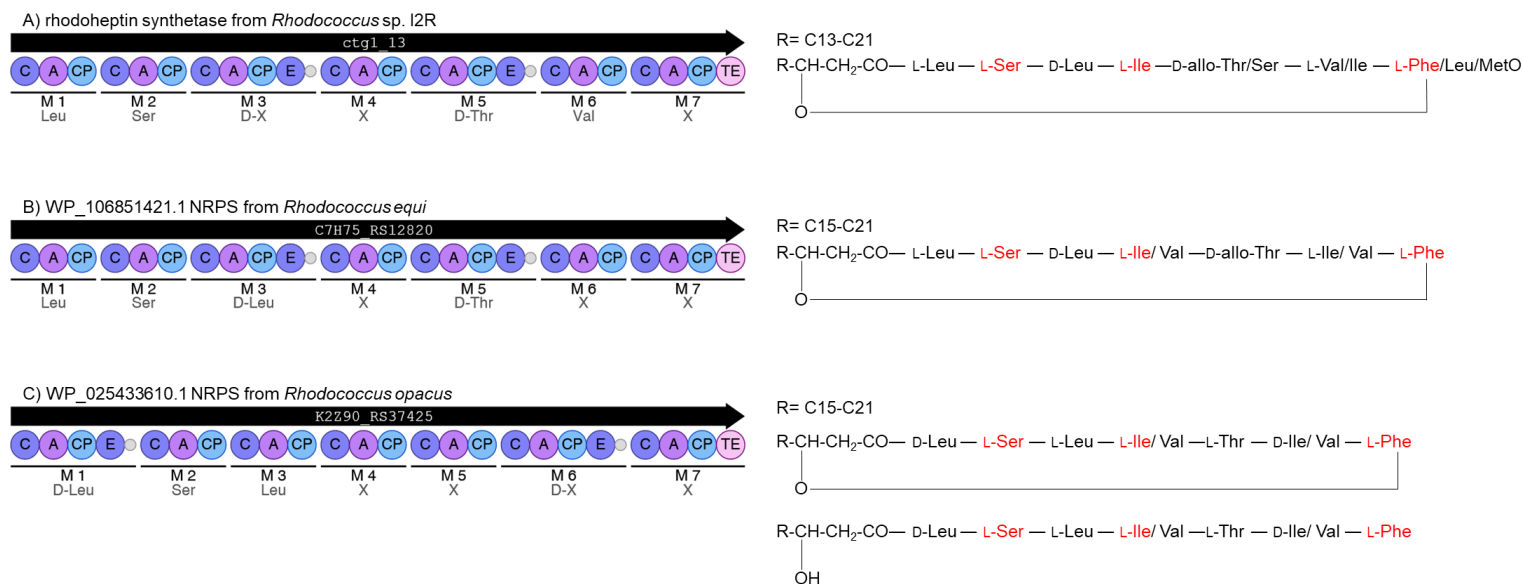

**Figure S28.** AntiSMASH analysis of *rhp* gene cluster from *Rhodococcus* sp. I2R (A) and rhodoheptin-related biosynthetic gene cluster from *R. equi* (B, WP\_106851421.1) and *R. opacus* (C, WP\_025433610.1) and general structures of the encoded metabolites. Conserved amino acid residues in the lipopeptide backbone are highlighted in red.

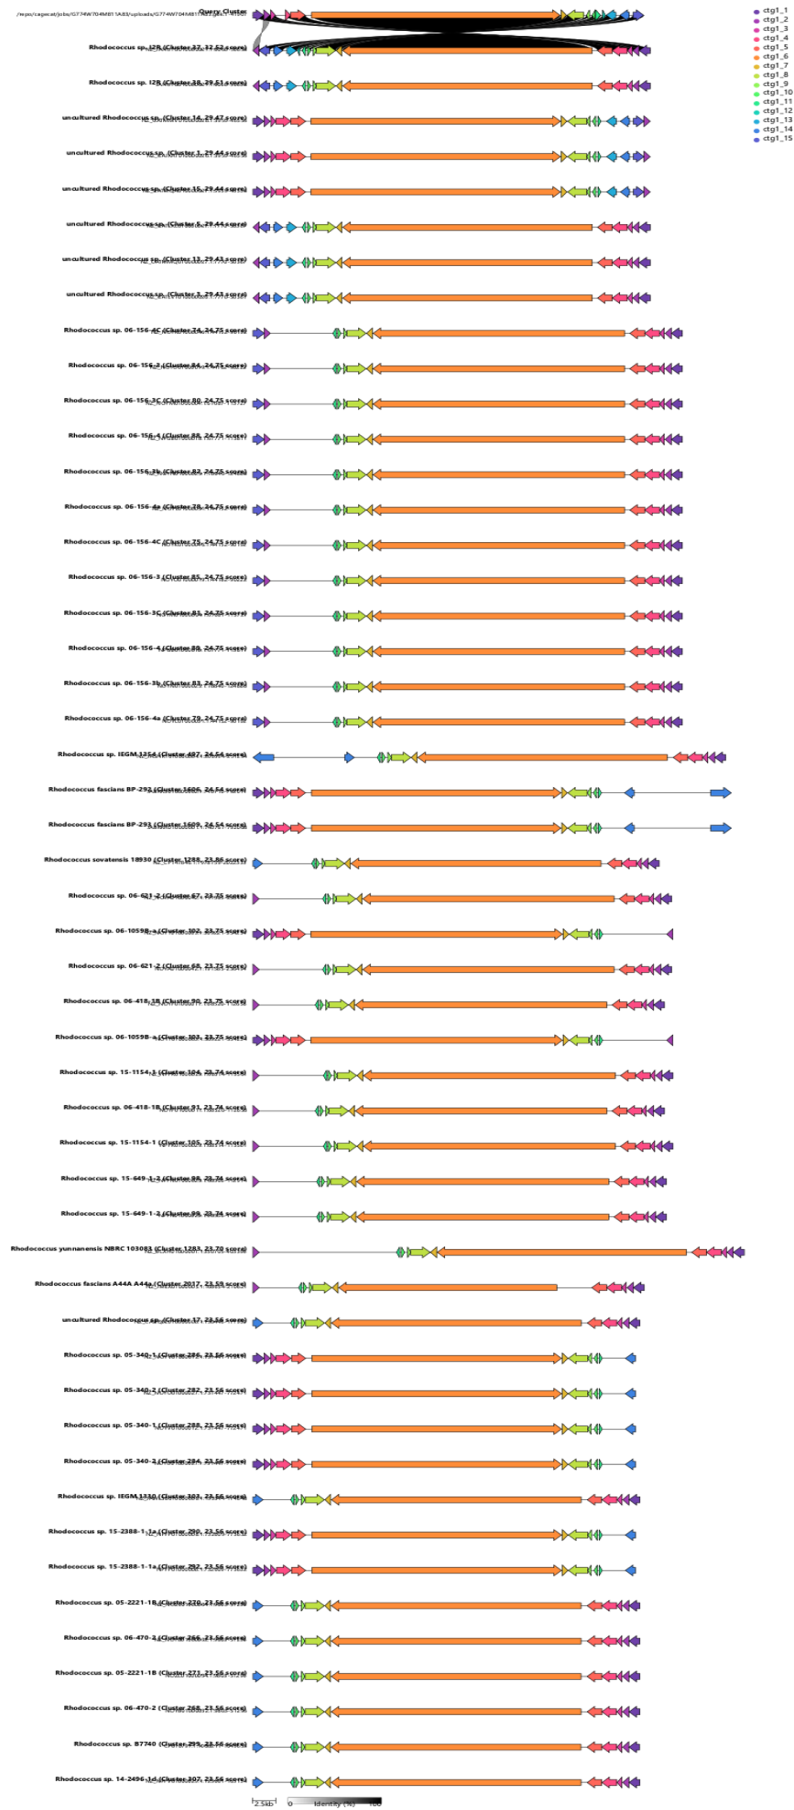

**Figure S29.** Clinker visualisation of the 50 most (based on cblaster score) similar BGC to the rhdheptin BGC.

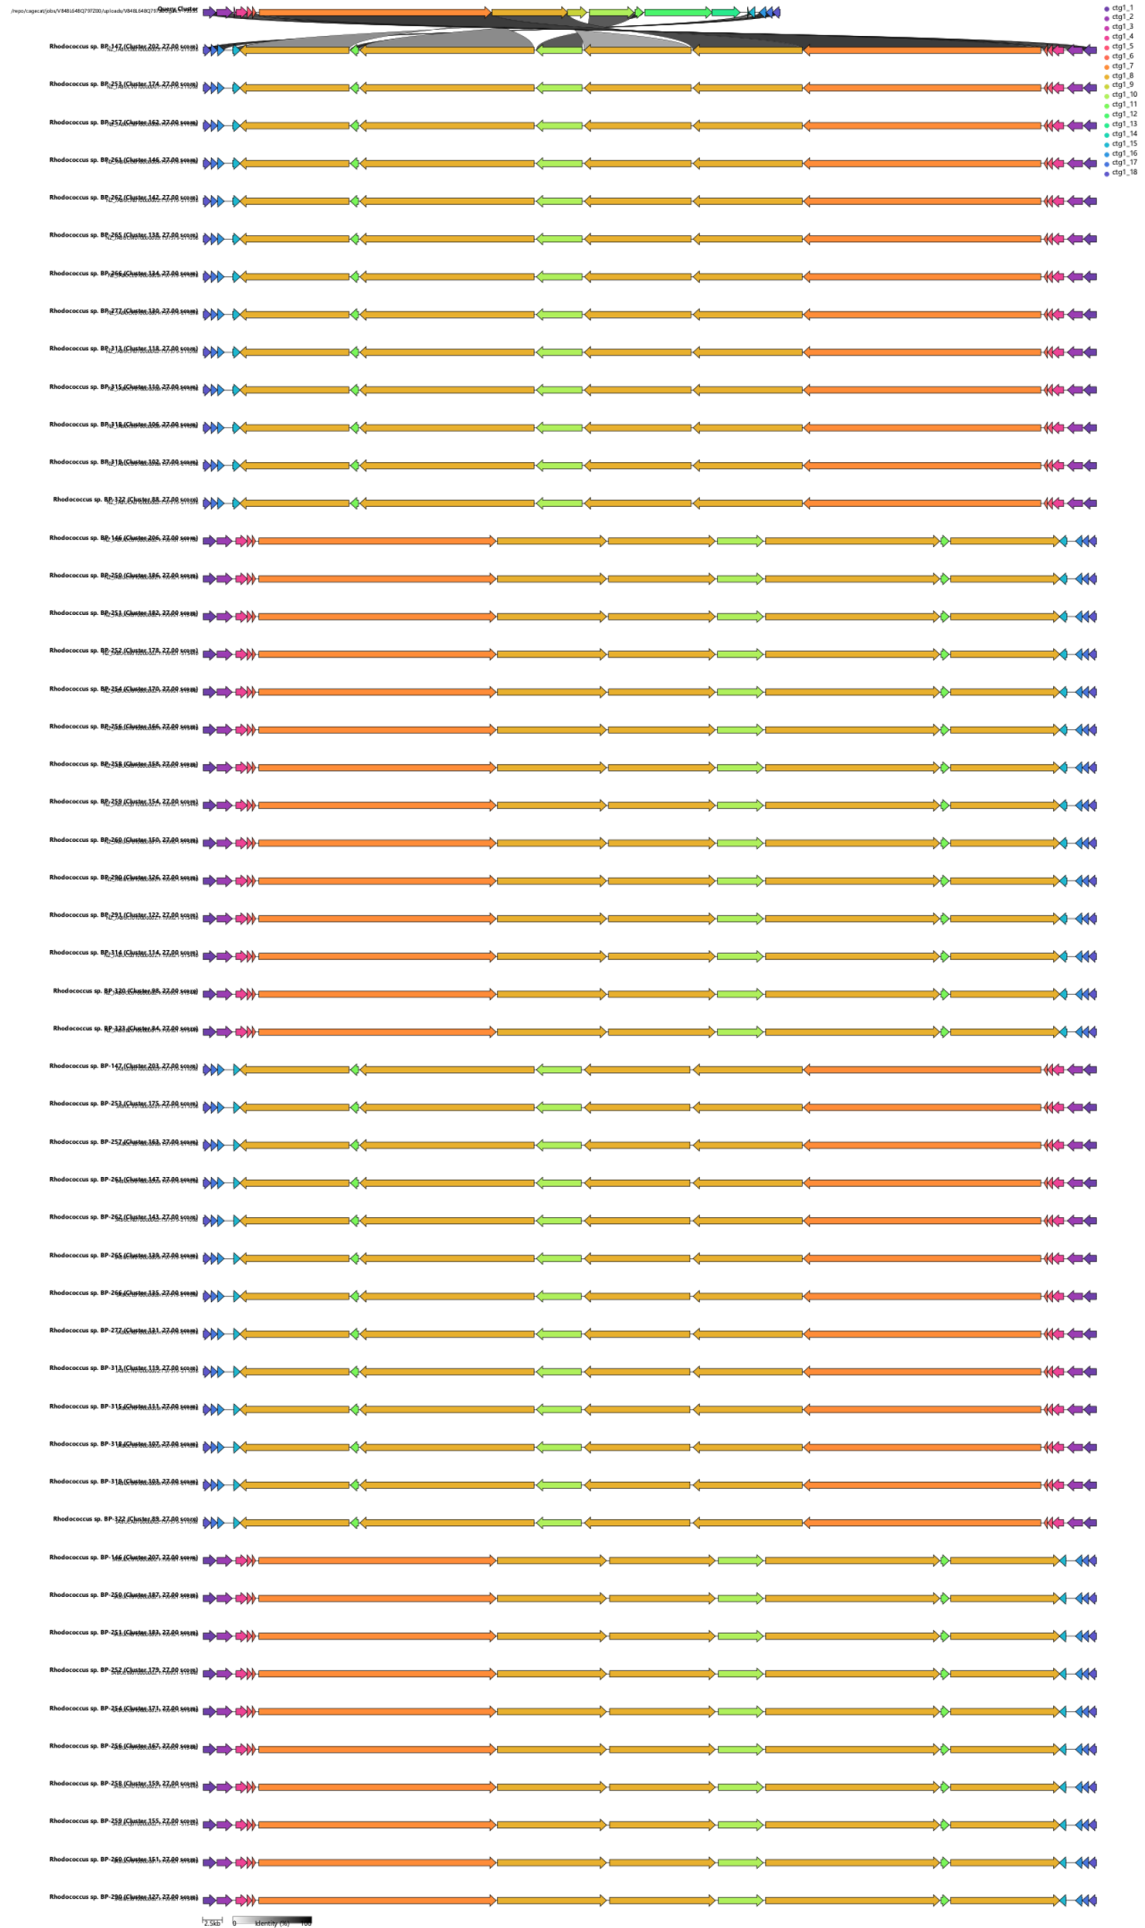

**Figure S30.** Clinker visualisation of the 50 most (based on cblaster score) similar BGC to the rhodamide BGC.
